# Supplementary material for: Transcriptome Analysis of Porcine PBMCs Reveals the Immune Cascade Response and Gene Ontology Terms Related to Cell Death and Fibrosis in the Progression of Liver Failure
Source: Hindawi journal article supplement (doi:10.1155/2018/2101906), 2018-01-01
Supplement: f1 [file 2101906.f1.pdf]

Supplementary Table 1. List of differentially expressed genes identified in failure group

| Gene XLOC Number | Gene Symbol/ID               | Adjust p |
|------------------|------------------------------|----------|
| XLOC_000001      | DLL1                         | 0.010072 |
| XLOC_000042      | ENSSSCG00000024378           | 0.002372 |
| XLOC_000054      | CNKSR3                       | 0.027994 |
| XLOC_000096      | -                            | 0.045290 |
| XLOC_000146      | SAMD3                        | 0.002372 |
| XLOC_000192      | FAM135A                      | 0.002372 |
| XLOC_000211      | SLC35A1                      | 0.035659 |
| XLOC_000244      | ENSSSCG00000004369           | 0.002372 |
| XLOC_000330      | RAB27B                       | 0.002372 |
| XLOC_000357      | RORA                         | 0.002372 |
| XLOC_000359      | ANXA2                        | 0.039463 |
| XLOC_000431      | C15orf48,ENSSSCG00000018328  | 0.031419 |
| XLOC_000519      | SCG5                         | 0.007395 |
| XLOC_000563      | ENSSSCG00000004870           | 0.002372 |
| XLOC_000579      | ENSSSCG00000021694,SERPINB11 | 0.027058 |
| XLOC_000581      | -                            | 0.002372 |
| XLOC_000690      | LGALS3                       | 0.011350 |
| XLOC_000694      | PELI2                        | 0.020320 |
| XLOC_000716      | PKC                          | 0.027058 |
| XLOC_000784      | ADFP,ENSSSCG00000005172      | 0.002372 |
| XLOC_000788      | PSIP1                        | 0.008746 |
| XLOC_000845      | ANXA1                        | 0.045290 |
| XLOC_000858      | PSAT1                        | 0.027058 |
| XLOC_000909      | ANP32B                       | 0.010072 |
| XLOC_000917      | NOR-1                        | 0.034852 |
| XLOC_000994      | TLR4                         | 0.041076 |
| XLOC_001067      | STXBP1                       | 0.002372 |
| XLOC_001097      | TOR1B                        | 0.029810 |
| XLOC_001130      | FCN2                         | 0.018305 |
| XLOC_001231      | SYTL3                        | 0.002372 |
| XLOC_001246      | ENSSSCG00000004072           | 0.045290 |
| XLOC_001252      | SYNE1                        | 0.002372 |
| XLOC_001263      | LRP11                        | 0.033125 |
| XLOC_001278      | RAB32                        | 0.045290 |
| XLOC_001282      | -                            | 0.002372 |
| XLOC_001283      | ENSSSCG00000026681           | 0.012580 |
| XLOC_001285      | STX11                        | 0.002372 |
| XLOC_001303      | CCDC28A                      | 0.036488 |
| XLOC_001361      | SMPDL3A                      | 0.008746 |

|             |                                           |          |
|-------------|-------------------------------------------|----------|
| XLOC_001374 | NUS1                                      | 0.044005 |
| XLOC_001412 | CGA                                       | 0.007395 |
| XLOC_001424 | RRAGD                                     | 0.002372 |
| XLOC_001429 | -                                         | 0.016103 |
| XLOC_001509 | FAM26F                                    | 0.002372 |
| XLOC_001541 | PSTPIP2                                   | 0.035659 |
| XLOC_001584 | ENSSSCG00000004560                        | 0.015000 |
| XLOC_001585 | DAPK2                                     | 0.002372 |
| XLOC_001617 | AQP9                                      | 0.019332 |
| XLOC_001651 | SEMA6D                                    | 0.004177 |
| XLOC_001654 | SLC28A2                                   | 0.002372 |
| XLOC_001682 | SP23                                      | 0.022312 |
| XLOC_001688 | ENSSSCG00000020666                        | 0.022312 |
| XLOC_001723 | THBS1                                     | 0.002372 |
| XLOC_001725 | SPRED1                                    | 0.005845 |
| XLOC_001796 | SERPINB8                                  | 0.015000 |
| XLOC_001797 | SERPINB10                                 | 0.002372 |
| XLOC_001802 | TNFRSF11A                                 | 0.017207 |
| XLOC_001823 | RAB11A                                    | 0.029810 |
| XLOC_001845 | ENSSSCG00000004963                        | 0.007395 |
| XLOC_001859 | PNN                                       | 0.002372 |
| XLOC_001892 | GNG2                                      | 0.038749 |
| XLOC_001902 | BMP4                                      | 0.036488 |
| XLOC_001933 | ISG20                                     | 0.002372 |
| XLOC_001974 | ACER2                                     | 0.007395 |
| XLOC_002012 | Metazoa_SRP                               | 0.004177 |
| XLOC_002028 | MAMDC2                                    | 0.025115 |
| XLOC_002063 | Rse_MRP                                   | 0.002372 |
| XLOC_002099 | CORO2A,TBC1D2                             | 0.020320 |
| XLOC_002100 | ENSSSCG00000005377,ENSSSC<br>G00000027558 | 0.002372 |
| XLOC_002140 | TRX1                                      | 0.002372 |
| XLOC_002183 | ENSSSCG00000028117                        | 0.019332 |
| XLOC_002184 | MEGF9                                     | 0.002372 |
| XLOC_002258 | FAM129B                                   | 0.038749 |
| XLOC_002320 | FCN1                                      | 0.021314 |
| XLOC_002611 | -                                         | 0.034852 |
| XLOC_002663 | -                                         | 0.030613 |
| XLOC_002685 | -                                         | 0.037305 |
| XLOC_002776 | -                                         | 0.005845 |
| XLOC_002863 | -                                         | 0.004177 |
| XLOC_003355 | -                                         | 0.041848 |
| XLOC_003356 | -                                         | 0.033995 |
| XLOC_003473 | -                                         | 0.002372 |

|             |                    |          |
|-------------|--------------------|----------|
| XLOC_003946 | CNIH4              | 0.015000 |
| XLOC_003991 | DENND1B            | 0.004177 |
| XLOC_004019 | FBP1               | 0.002372 |
| XLOC_004051 | AQP3               | 0.045889 |
| XLOC_004068 | C9orf72            | 0.002372 |
| XLOC_004096 | -                  | 0.032252 |
| XLOC_004105 | -                  | 0.032252 |
| XLOC_004196 | KLF6               | 0.025115 |
| XLOC_004224 | RGS2               | 0.039463 |
| XLOC_004225 | RGS1               | 0.002372 |
| XLOC_004228 | RGS18              | 0.004177 |
| XLOC_004443 | FRMD4A             | 0.040229 |
| XLOC_004477 | NRP1               | 0.002372 |
| XLOC_004492 | GATA3              | 0.002372 |
| XLOC_004736 | -                  | 0.021314 |
| XLOC_004941 | -                  | 0.042609 |
| XLOC_004983 | -                  | 0.019332 |
| XLOC_005126 | -                  | 0.021314 |
| XLOC_005174 | SLC46A3            | 0.002372 |
| XLOC_005184 | ALOX5AP            | 0.010072 |
| XLOC_005201 | ENSSSCG00000021829 | 0.030613 |
| XLOC_005214 | LHFP               | 0.044653 |
| XLOC_005456 | -                  | 0.008746 |
| XLOC_005472 | CDADC1             | 0.022312 |
| XLOC_005499 | TNFSF11            | 0.015000 |
| XLOC_005530 | -                  | 0.028943 |
| XLOC_005537 | -                  | 0.011350 |
| XLOC_005550 | SPRY2              | 0.012580 |
| XLOC_005568 | ENSSSCG00000028678 | 0.007395 |
| XLOC_005590 | ENSSSCG00000009518 | 0.043224 |
| XLOC_005623 | RAB20              | 0.012580 |
| XLOC_005629 | LAMP1              | 0.033995 |
| XLOC_005637 | GAS6               | 0.012580 |
| XLOC_006065 | FN3K, FN3KRP       | 0.045290 |
| XLOC_006094 | TIMP-2             | 0.004177 |
| XLOC_006097 | -                  | 0.004177 |
| XLOC_006099 | SCAR16             | 0.007395 |
| XLOC_006206 | PLEKHM1            | 0.010072 |
| XLOC_006227 | GRN                | 0.004177 |
| XLOC_006237 | PYY                | 0.018305 |
| XLOC_006249 | RND2               | 0.025115 |
| XLOC_006251 | TMEM106A           | 0.002372 |
| XLOC_006289 | TOP2A              | 0.008746 |
| XLOC_006378 | ABCC3              | 0.007395 |

|             |                    |          |
|-------------|--------------------|----------|
| XLOC_006388 | TOM1L1             | 0.015000 |
| XLOC_006465 | CCL23              | 0.002372 |
| XLOC_006466 | CCL16              | 0.002372 |
| XLOC_006467 | CCL5               | 0.002372 |
| XLOC_006472 | ENSSSCG00000024115 | 0.030613 |
| XLOC_006484 | CCL8               | 0.002372 |
| XLOC_006485 | CCL2               | 0.002372 |
| XLOC_006506 | ENSSSCG00000017754 | 0.002372 |
| XLOC_006581 | SPNS3              | 0.008746 |
| XLOC_006596 | CXCL16             | 0.036488 |
| XLOC_006635 | CHD3               | 0.002372 |
| XLOC_006728 | SEC14L1            | 0.048079 |
| XLOC_006734 | SPHK1              | 0.004177 |
| XLOC_006793 | AXIN2              | 0.019332 |
| XLOC_006844 | ITGA2B             | 0.002372 |
| XLOC_006856 | VAT1               | 0.044005 |
| XLOC_006866 | RAMP2              | 0.022312 |
| XLOC_006965 | TMEM92             | 0.020320 |
| XLOC_006993 | SCPEP1             | 0.004177 |
| XLOC_007043 | SNORA11            | 0.043224 |
| XLOC_007074 | ADAP2              | 0.002372 |
| XLOC_007086 | NOS2               | 0.004177 |
| XLOC_007117 | SLC6A4             | 0.002372 |
| XLOC_007130 | FAM101B            | 0.016103 |
| XLOC_007169 | ENSSSCG00000022405 | 0.015000 |
| XLOC_007180 | XAF1               | 0.047338 |
| XLOC_007186 | WSCD1              | 0.002372 |
| XLOC_007195 | GPIBA              | 0.004177 |
| XLOC_007220 | ENSSSCG00000025782 | 0.012580 |
| XLOC_007486 | -                  | 0.017207 |
| XLOC_007527 | -                  | 0.044653 |
| XLOC_007658 | -                  | 0.002372 |
| XLOC_007930 | EIF1B              | 0.002372 |
| XLOC_007972 | CCR2               | 0.004177 |
| XLOC_007973 | CCR5               | 0.010072 |
| XLOC_007974 | CCRL2              | 0.022312 |
| XLOC_007978 | PTH1R              | 0.004177 |
| XLOC_008183 | -                  | 0.002372 |
| XLOC_008184 | DJC13              | 0.036488 |
| XLOC_008198 | CEP63              | 0.012580 |
| XLOC_008234 | ENSSSCG00000011676 | 0.030613 |
| XLOC_008261 | P2RY1              | 0.004177 |
| XLOC_008279 | ENSSSCG00000027556 | 0.021314 |
| XLOC_008283 | MFSD1              | 0.007395 |

|             |                           |          |
|-------------|---------------------------|----------|
| XLOC_008288 | -                         | 0.018305 |
| XLOC_008299 | -                         | 0.016103 |
| XLOC_008306 | -                         | 0.002372 |
| XLOC_008402 | IL1RAP                    | 0.008746 |
| XLOC_008410 | HES1                      | 0.017207 |
| XLOC_008438 | OSBPL11                   | 0.005845 |
| XLOC_008486 | UBE2B                     | 0.008746 |
| XLOC_008549 | ENSSSCG00000025392        | 0.002372 |
| XLOC_008556 | GBE1                      | 0.002372 |
| XLOC_008557 | -                         | 0.004177 |
| XLOC_008562 | ENSSSCG00000012006        | 0.020320 |
| XLOC_008619 | BACE2                     | 0.013835 |
| XLOC_008658 | -                         | 0.002372 |
| XLOC_008665 | ANKRD28                   | 0.033995 |
| XLOC_008698 | -                         | 0.026101 |
| XLOC_008737 | CX3CR1                    | 0.002372 |
| XLOC_008772 | CCR1                      | 0.002372 |
| XLOC_008773 | CCR2                      | 0.002372 |
| XLOC_008774 | LTF                       | 0.002372 |
| XLOC_008809 | ENSSSCG00000011361        | 0.002372 |
| XLOC_008812 | SLC25A20                  | 0.002372 |
| XLOC_008826 | UBA7                      | 0.035659 |
| XLOC_008840 | MAPKAPK3                  | 0.004177 |
| XLOC_008872 | TKT                       | 0.002372 |
| XLOC_008990 | TMEM40                    | 0.007395 |
| XLOC_008992 | PLXND1                    | 0.037305 |
| XLOC_009004 | FBLN2                     | 0.022312 |
| XLOC_009030 | ACPP                      | 0.008746 |
| XLOC_009103 | SIAH2                     | 0.015000 |
| XLOC_009109 | P2RY13                    | 0.002372 |
| XLOC_009150 | BCHE                      | 0.002372 |
| XLOC_009185 | -                         | 0.011350 |
| XLOC_009197 | B3GNT5                    | 0.005845 |
| XLOC_009239 | MB21D2                    | 0.044005 |
| XLOC_009273 | MYLK                      | 0.010072 |
| XLOC_009275 | -                         | 0.002372 |
| XLOC_009289 | ENSSSCG00000027867        | 0.002372 |
| XLOC_009322 | ATP6V1A,GRAMD1C           | 0.037305 |
| XLOC_009342 | TRAT1                     | 0.030613 |
| XLOC_009401 | CRYBG3,ENSSSCG00000022895 | 0.002372 |
| XLOC_009405 | ENSSSCG00000011993        | 0.002372 |
| XLOC_009414 | ENSSSCG00000029384        | 0.002372 |
| XLOC_009468 | ENSSSCG00000024614        | 0.040229 |
| XLOC_009489 | -                         | 0.048079 |

|             |                           |          |
|-------------|---------------------------|----------|
| XLOC_009518 | TRPM2                     | 0.045889 |
| XLOC_010021 | -                         | 0.020320 |
| XLOC_010181 | -                         | 0.005845 |
| XLOC_010667 | -                         | 0.002372 |
| XLOC_010848 | -                         | 0.005845 |
| XLOC_011044 | ENSSSCG00000009627        | 0.024202 |
| XLOC_011174 | CCDC63                    | 0.007395 |
| XLOC_011178 | SH2B3                     | 0.027058 |
| XLOC_011204 | PLBD2                     | 0.029810 |
| XLOC_011210 | OAS2                      | 0.002372 |
| XLOC_011222 | U4                        | 0.002372 |
| XLOC_011230 | MLEC                      | 0.037305 |
| XLOC_011249 | CMLKR1                    | 0.002372 |
| XLOC_011365 | GP1BB                     | 0.016103 |
| XLOC_011373 | ENSSSCG00000026176        | 0.027994 |
| XLOC_011406 | TTC13                     | 0.013835 |
| XLOC_011536 | -                         | 0.048079 |
| XLOC_011557 | MINPP1                    | 0.021314 |
| XLOC_011567 | IFIT2                     | 0.002372 |
| XLOC_011568 | IFIT3                     | 0.002372 |
| XLOC_011569 | IFIT1                     | 0.004177 |
| XLOC_011570 | IFIT5                     | 0.011350 |
| XLOC_011579 | HHEX                      | 0.023280 |
| XLOC_011589 | SLC35G1                   | 0.002372 |
| XLOC_011599 | ENSSSCG00000010498,ENTPD1 | 0.004177 |
| XLOC_011819 | ENTPD4                    | 0.019332 |
| XLOC_011978 | ENSSSCG00000009926        | 0.002372 |
| XLOC_012015 | OSM                       | 0.002372 |
| XLOC_012029 | PATZ1,PIK3IP1             | 0.041076 |
| XLOC_012128 | RHOU                      | 0.021314 |
| XLOC_012142 | ANK3                      | 0.046618 |
| XLOC_012180 | PRF1                      | 0.002372 |
| XLOC_012221 | TMEM254                   | 0.004177 |
| XLOC_012271 | ALOX5                     | 0.002372 |
| XLOC_012278 | PRKG1                     | 0.020320 |
| XLOC_012285 | ANKRD22                   | 0.002372 |
| XLOC_012288 | LIPA                      | 0.037305 |
| XLOC_012301 | ENSSSCG00000010476        | 0.033125 |
| XLOC_012337 | SLC25A28                  | 0.008746 |
| XLOC_012442 | CHST15                    | 0.002372 |
| XLOC_013061 | -                         | 0.017207 |
| XLOC_013248 | CXCR4                     | 0.002372 |
| XLOC_013276 | MARCO                     | 0.002372 |
| XLOC_013283 | BIN1                      | 0.002372 |

|             |                                           |          |
|-------------|-------------------------------------------|----------|
| XLOC_013297 | PTPN4                                     | 0.049392 |
| XLOC_013306 | KBTBD11                                   | 0.004177 |
| XLOC_013333 | CASP3                                     | 0.044653 |
| XLOC_013394 | G3PD                                      | 0.002372 |
| XLOC_013402 | ENSSSCG00000015880                        | 0.032252 |
| XLOC_013497 | -                                         | 0.005845 |
| XLOC_013517 | ENSSSCG00000027157                        | 0.002372 |
| XLOC_013518 | ENSSSCG00000016040                        | 0.002372 |
| XLOC_013533 | ENSSSCG00000016063,ENSSSC<br>G00000026618 | 0.007395 |
| XLOC_013547 | PLCL1                                     | 0.002372 |
| XLOC_013583 | FAM117B                                   | 0.010072 |
| XLOC_013641 | NRAMP1                                    | 0.002372 |
| XLOC_013812 | -                                         | 0.020320 |
| XLOC_013824 | HNMT                                      | 0.002372 |
| XLOC_013826 | -                                         | 0.049392 |
| XLOC_013900 | FACL2                                     | 0.048740 |
| XLOC_013910 | FAM149A                                   | 0.008746 |
| XLOC_013975 | NR4A2                                     | 0.027058 |
| XLOC_014072 | TFPI                                      | 0.019332 |
| XLOC_014077 | ENSSSCG00000026081                        | 0.002372 |
| XLOC_014081 | ENSSSCG00000027221                        | 0.002372 |
| XLOC_014089 | STAT1                                     | 0.040229 |
| XLOC_014090 | STAT4                                     | 0.033125 |
| XLOC_014123 | ENSSSCG00000016106                        | 0.030613 |
| XLOC_014160 | IDH1                                      | 0.002372 |
| XLOC_014170 | FN1                                       | 0.002372 |
| XLOC_014177 | ENSSSCG00000027669                        | 0.005845 |
| XLOC_014179 | ENSSSCG00000016184                        | 0.049392 |
| XLOC_014237 | DNER                                      | 0.049392 |
| XLOC_014263 | -                                         | 0.029810 |
| XLOC_014271 | SCAR6                                     | 0.004177 |
| XLOC_014941 | -                                         | 0.017207 |
| XLOC_015077 | EMB,SNORD28                               | 0.034852 |
| XLOC_015081 | ITGA2                                     | 0.002372 |
| XLOC_015088 | GZMA                                      | 0.008746 |
| XLOC_015103 | -                                         | 0.007395 |
| XLOC_015112 | ENSSSCG00000016938                        | 0.038059 |
| XLOC_015127 | LY64                                      | 0.002372 |
| XLOC_015150 | -                                         | 0.049392 |
| XLOC_015198 | RNF145                                    | 0.029810 |
| XLOC_015204 | ADAM19                                    | 0.010072 |
| XLOC_015249 | CH242-128B1.2                             | 0.012580 |
| XLOC_015324 | DAB2                                      | 0.039463 |

|             |                           |          |
|-------------|---------------------------|----------|
| XLOC_015339 | -                         | 0.004177 |
| XLOC_016059 | AP3M2                     | 0.002372 |
| XLOC_016098 | PC2                       | 0.019332 |
| XLOC_016127 | CD93                      | 0.002372 |
| XLOC_016139 | ENSSSCG00000023107        | 0.005845 |
| XLOC_016145 | SIGLEC1                   | 0.007395 |
| XLOC_016302 | SLPI                      | 0.002372 |
| XLOC_016303 | ENSSSCG00000025317,PTI    | 0.036488 |
| XLOC_016314 | MMP9                      | 0.002372 |
| XLOC_016343 | C/EBP,CEBPB               | 0.017207 |
| XLOC_016414 | MSR1                      | 0.002372 |
| XLOC_016418 | ENSSSCG00000006989        | 0.011350 |
| XLOC_016424 | ASAH1                     | 0.030613 |
| XLOC_016434 | IDO1                      | 0.002372 |
| XLOC_016459 | PRP                       | 0.002372 |
| XLOC_016465 | GPCPD1                    | 0.022312 |
| XLOC_016492 | SNORD17                   | 0.002372 |
| XLOC_016521 | SMOX                      | 0.002372 |
| XLOC_016666 | ENSSSCG00000022258        | 0.002372 |
| XLOC_016700 | SULF2                     | 0.002372 |
| XLOC_016703 | ENSSSCG00000022915        | 0.045889 |
| XLOC_016706 | DRK1                      | 0.002372 |
| XLOC_016709 | B4GALT5                   | 0.010072 |
| XLOC_016820 | -                         | 0.011350 |
| XLOC_017187 | AOC1                      | 0.020320 |
| XLOC_017188 | GIMAP1                    | 0.047338 |
| XLOC_017233 | CREB3L2                   | 0.021314 |
| XLOC_017304 | TSPAN12                   | 0.002372 |
| XLOC_017313 | TFEC                      | 0.002372 |
| XLOC_017393 | ENSSSCG00000016732,SNORA5 | 0.002372 |
| XLOC_017416 | PSMA2                     | 0.011350 |
| XLOC_017459 | GALNTL5                   | 0.011350 |
| XLOC_017499 | ENSSSCG00000029386        | 0.038059 |
| XLOC_017516 | TBXAS1                    | 0.049392 |
| XLOC_017596 | GPR37                     | 0.002372 |
| XLOC_017680 | ENSSSCG00000023695        | 0.020320 |
| XLOC_017682 | SNX10                     | 0.022312 |
| XLOC_018104 | -                         | 0.011350 |
| XLOC_018122 | -                         | 0.025115 |
| XLOC_018272 | CPT1A                     | 0.002372 |
| XLOC_018278 | ENSSSCG00000028501        | 0.008746 |
| XLOC_018344 | BATF2                     | 0.002372 |
| XLOC_018432 | MPEG1                     | 0.002372 |
| XLOC_018494 | C1QTNF4                   | 0.030613 |



|             |                                           |          |
|-------------|-------------------------------------------|----------|
| XLOC_018565 | LGR4                                      | 0.002372 |
| XLOC_018566 | CCDC34                                    | 0.008746 |
| XLOC_018585 | ENSSSCG00000021688                        | 0.022312 |
| XLOC_018606 | PIK3C2A                                   | 0.002372 |
| XLOC_018634 | LYVE1                                     | 0.019332 |
| XLOC_018702 | ENSSSCG00000027848                        | 0.038749 |
| XLOC_018727 | ENSSSCG00000024211                        | 0.018305 |
| XLOC_018866 | RETN                                      | 0.002372 |
| XLOC_018867 | -                                         | 0.004177 |
| XLOC_018880 | ADGRE1,ENSSSCG00000022228                 | 0.002372 |
| XLOC_018928 | MFS12                                     | 0.040229 |
| XLOC_018954 | ARID3A                                    | 0.013835 |
| XLOC_018999 | ADAMTS2                                   | 0.013835 |
| XLOC_019017 | HK3                                       | 0.002372 |
| XLOC_019051 | LHFPL2                                    | 0.004177 |
| XLOC_019073 | VCAN                                      | 0.004177 |
| XLOC_019122 | CAMK4,STARD4                              | 0.041848 |
| XLOC_019155 | SNX24                                     | 0.027058 |
| XLOC_019235 | CTN1                                      | 0.004177 |
| XLOC_019238 | SNORA74                                   | 0.015000 |
| XLOC_019297 | ABLIM3                                    | 0.002372 |
| XLOC_019369 | ATGL                                      | 0.025115 |
| XLOC_019400 | CPT1A                                     | 0.034852 |
| XLOC_019446 | CTSW                                      | 0.002372 |
| XLOC_019538 | SLC15A3                                   | 0.048740 |
| XLOC_019570 | FAM111A                                   | 0.033125 |
| XLOC_019571 | FAM111B                                   | 0.002372 |
| XLOC_019690 | CD59                                      | 0.002372 |
| XLOC_019737 | NUCB2                                     | 0.025115 |
| XLOC_019753 | -                                         | 0.017207 |
| XLOC_019765 | ADM                                       | 0.002372 |
| XLOC_019825 | B3GNT3                                    | 0.030613 |
| XLOC_019847 | ENSSSCG00000013842,ENSSSC<br>G00000027903 | 0.002372 |
| XLOC_019970 | RAB3D                                     | 0.002372 |
| XLOC_020010 | -                                         | 0.005845 |
| XLOC_020038 | UHRF1                                     | 0.044005 |
| XLOC_020072 | GADD45B                                   | 0.004177 |
| XLOC_020157 | ENC1                                      | 0.043224 |
| XLOC_020198 | -                                         | 0.019332 |
| XLOC_020208 | -                                         | 0.026101 |
| XLOC_020237 | LIX1                                      | 0.002372 |
| XLOC_020370 | CD14                                      | 0.002372 |
| XLOC_020383 | ARAP3                                     | 0.002372 |

|             |                         |          |
|-------------|-------------------------|----------|
| XLOC_020417 | -                       | 0.004177 |
| XLOC_021078 | -                       | 0.028943 |
| XLOC_021079 | -                       | 0.010072 |
| XLOC_021428 | TTYH3                   | 0.034852 |
| XLOC_021497 | ENSSSCG00000023912      | 0.002372 |
| XLOC_021550 | -                       | 0.002372 |
| XLOC_021554 | TRIM72                  | 0.002372 |
| XLOC_021574 | -                       | 0.002372 |
| XLOC_021586 | SPNS1                   | 0.016103 |
| XLOC_021667 | ROGDI                   | 0.002372 |
| XLOC_021693 | -                       | 0.049392 |
| XLOC_021737 | SLC9A3R2                | 0.002372 |
| XLOC_021751 | ATP6V0C                 | 0.029810 |
| XLOC_021783 | ENSSSCG00000022493      | 0.002372 |
| XLOC_021810 | CCDC138                 | 0.016103 |
| XLOC_021814 | NCK2                    | 0.049392 |
| XLOC_021823 | IL1R2                   | 0.002372 |
| XLOC_021824 | -                       | 0.002372 |
| XLOC_021868 | CD8B                    | 0.043224 |
| XLOC_021874 | -                       | 0.010072 |
| XLOC_021882 | NKL                     | 0.002372 |
| XLOC_021958 | -                       | 0.020320 |
| XLOC_021966 | RAB1B                   | 0.027058 |
| XLOC_022009 | ENSSSCG00000008409,RTN4 | 0.024202 |
| XLOC_022195 | CMPK2                   | 0.004177 |
| XLOC_022222 | PDGFA                   | 0.023280 |
| XLOC_022337 | TPST1                   | 0.019332 |
| XLOC_022353 | COX6A2                  | 0.024202 |
| XLOC_022354 | -                       | 0.030613 |
| XLOC_022357 | ENSSSCG00000007758      | 0.026101 |
| XLOC_022515 | IL9R                    | 0.015000 |
| XLOC_022592 | IL1A                    | 0.030613 |
| XLOC_022634 | FHL2                    | 0.010072 |
| XLOC_022644 | IL1RL1                  | 0.002372 |
| XLOC_022647 | IL1R2                   | 0.002372 |
| XLOC_022689 | CD8A                    | 0.004177 |
| XLOC_022721 | RPL7A                   | 0.044653 |
| XLOC_022725 | HK2                     | 0.002372 |
| XLOC_022761 | GK                      | 0.002372 |
| XLOC_022773 | ANXA4                   | 0.004177 |
| XLOC_022795 | ENSSSCG00000030005      | 0.002372 |
| XLOC_022893 | ENSSSCG00000008491      | 0.008746 |
| XLOC_022920 | YPEL5                   | 0.011350 |
| XLOC_022955 | SLC35F6                 | 0.023280 |

|             |                          |          |
|-------------|--------------------------|----------|
| XLOC_023010 | -                        | 0.016103 |
| XLOC_023012 | IRG6                     | 0.032252 |
| XLOC_023481 | -                        | 0.018305 |
| XLOC_023674 | -                        | 0.002372 |
| XLOC_024100 | ENSSSCG00000006954       | 0.007395 |
| XLOC_024107 | SLC45A4                  | 0.007395 |
| XLOC_024191 | ANGPT1                   | 0.045889 |
| XLOC_024205 | NCALD                    | 0.004177 |
| XLOC_024271 | CA1                      | 0.002372 |
| XLOC_024281 | ZBTB10                   | 0.036488 |
| XLOC_024313 | SNORD87                  | 0.002372 |
| XLOC_024327 | GGH                      | 0.011350 |
| XLOC_024369 | SELP                     | 0.002372 |
| XLOC_024370 | F5                       | 0.007395 |
| XLOC_024381 | CD3Z                     | 0.002372 |
| XLOC_024415 | SLAMF7                   | 0.016103 |
| XLOC_024531 | S100A9                   | 0.002372 |
| XLOC_024563 | FAM63A                   | 0.046618 |
| XLOC_024593 | PRKAB2                   | 0.021314 |
| XLOC_024605 | ZNF697                   | 0.021314 |
| XLOC_024626 | TSPAN2                   | 0.007395 |
| XLOC_024639 | SLC16A1                  | 0.036488 |
| XLOC_024669 | SORT1                    | 0.005845 |
| XLOC_024780 | GSDMD                    | 0.031419 |
| XLOC_024793 | ENSSSCG00000005941       | 0.037305 |
| XLOC_024810 | SQLE                     | 0.044653 |
| XLOC_024842 | AARD                     | 0.002372 |
| XLOC_024876 | KLF10                    | 0.046618 |
| XLOC_024898 | PGCP                     | 0.005845 |
| XLOC_024900 | SDC2                     | 0.002372 |
| XLOC_025058 | CD32                     | 0.004177 |
| XLOC_025141 | LM                       | 0.005845 |
| XLOC_025193 | S100A12                  | 0.002372 |
| XLOC_025194 | S100A8                   | 0.002372 |
| XLOC_025214 | TNFAIP8L2                | 0.030613 |
| XLOC_025218 | PRUNE                    | 0.011350 |
| XLOC_025223 | ECM1                     | 0.002372 |
| XLOC_025263 | ENSSSCG00000030938,PHGDH | 0.004177 |
| XLOC_025284 | MAB21L3,SLC22A15         | 0.010072 |
| XLOC_025619 | -                        | 0.002372 |
| XLOC_025832 | -                        | 0.023280 |
| XLOC_026020 | -                        | 0.012580 |
| XLOC_026339 | -                        | 0.007395 |
| XLOC_026397 | ENSSSCG00000029668       | 0.002372 |

|             |                          |          |
|-------------|--------------------------|----------|
| XLOC_026459 | ACVRL1                   | 0.007395 |
| XLOC_026460 | ACVR1B                   | 0.011350 |
| XLOC_026472 | EIF4B                    | 0.029810 |
| XLOC_026589 | SLC16A7                  | 0.002372 |
| XLOC_026616 | IFN-GAMMA                | 0.010072 |
| XLOC_026710 | -                        | 0.017207 |
| XLOC_026717 | LRP6                     | 0.002372 |
| XLOC_026726 | ENSSSCG00000000639       | 0.038749 |
| XLOC_026727 | ENSSSCG00000000640       | 0.002372 |
| XLOC_026728 | KLRK1                    | 0.002372 |
| XLOC_026739 | CLECL1                   | 0.004177 |
| XLOC_026741 | KLRB1                    | 0.004177 |
| XLOC_026746 | KLRG1                    | 0.002372 |
| XLOC_026750 | SLC2A3                   | 0.013835 |
| XLOC_026753 | ENSSSCG00000026009       | 0.002372 |
| XLOC_026767 | TNFRSF1A                 | 0.042609 |
| XLOC_026768 | VWF                      | 0.002372 |
| XLOC_026803 | USP18                    | 0.012580 |
| XLOC_026893 | LTA4H                    | 0.041848 |
| XLOC_026903 | PLXNC1                   | 0.040229 |
| XLOC_026921 | ATP2B1                   | 0.032252 |
| XLOC_026945 | DYRK2                    | 0.011350 |
| XLOC_027110 | PF4,PPBP                 | 0.012580 |
| XLOC_027144 | NFE2                     | 0.033995 |
| XLOC_027145 | ENSSSCG00000000291       | 0.002372 |
| XLOC_027181 | MMP19                    | 0.005845 |
| XLOC_027256 | -                        | 0.008746 |
| XLOC_027268 | LYZ                      | 0.002372 |
| XLOC_027330 | PDE3A                    | 0.041848 |
| XLOC_027350 | PLBD1                    | 0.002372 |
| XLOC_027353 | HEBP1                    | 0.047338 |
| XLOC_027356 | BCL2L14                  | 0.004177 |
| XLOC_027367 | CLEC1B                   | 0.002372 |
| XLOC_027378 | ENSSSCG00000025680       | 0.002372 |
| XLOC_027410 | KC6                      | 0.047338 |
| XLOC_027427 | ENSSSCG00000000744,FKBP4 | 0.031419 |
| XLOC_027459 | TWF1                     | 0.010072 |
| XLOC_027505 | DRAM1                    | 0.002372 |
| XLOC_027506 | CHPT1                    | 0.033125 |
| XLOC_027554 | ENSSSCG00000000921       | 0.002372 |
| XLOC_027606 | -                        | 0.027994 |
| XLOC_027691 | -                        | 0.029810 |
| XLOC_027930 | -                        | 0.002372 |
| XLOC_027941 | -                        | 0.033995 |

|             |                            |          |
|-------------|----------------------------|----------|
| XLOC_027950 | -                          | 0.002372 |
| XLOC_027954 | -                          | 0.040229 |
| XLOC_028073 | -                          | 0.048079 |
| XLOC_028322 | GPR56                      | 0.002372 |
| XLOC_028323 | ADGRG3                     | 0.010072 |
| XLOC_028380 | ENSSSCG00000026318         | 0.002372 |
| XLOC_028482 | RPS16                      | 0.038749 |
| XLOC_028575 | C5AR1                      | 0.002372 |
| XLOC_028576 | C5AR2,DHX34                | 0.035659 |
| XLOC_028645 | ENSSSCG00000003226         | 0.018305 |
| XLOC_028680 | -                          | 0.036488 |
| XLOC_028820 | PGD                        | 0.002372 |
| XLOC_028836 | MFN2                       | 0.012580 |
| XLOC_028839 | -                          | 0.039463 |
| XLOC_028868 | PADI4                      | 0.002372 |
| XLOC_028870 | ENSSSCG00000022946         | 0.043224 |
| XLOC_028885 | CDA                        | 0.002372 |
| XLOC_028924 | ENSSSCG00000024625,STMN1   | 0.016103 |
| XLOC_028954 | SMPDL3B                    | 0.002372 |
| XLOC_028972 | SDC3                       | 0.002372 |
| XLOC_029015 | UTP11L                     | 0.018305 |
| XLOC_029022 | ENSSSCG00000027920         | 0.024202 |
| XLOC_029199 | ZFYVE9                     | 0.024202 |
| XLOC_029254 | -                          | 0.036488 |
| XLOC_029322 | KIAA0513                   | 0.002372 |
| XLOC_029400 | CCDC102A                   | 0.011350 |
| XLOC_029426 | ATP6V0D1                   | 0.027058 |
| XLOC_029472 | C/EBP                      | 0.002372 |
| XLOC_029484 | FFAR2                      | 0.002372 |
| XLOC_029570 | AXL                        | 0.002372 |
| XLOC_029610 | PVR                        | 0.048740 |
| XLOC_029619 | PTGIR                      | 0.002372 |
| XLOC_029701 | NKG7                       | 0.007395 |
| XLOC_029708 | ENSSSCG00000024518,SIGLEC5 | 0.005845 |
| XLOC_029722 | NLRP12                     | 0.002372 |
| XLOC_029727 | TARM1                      | 0.002372 |
| XLOC_029898 | PADI2                      | 0.002372 |
| XLOC_029900 | ARHGEF10L                  | 0.004177 |
| XLOC_029922 | ECE1                       | 0.002372 |
| XLOC_029936 | PITHD1                     | 0.004177 |
| XLOC_029943 | RUNX3                      | 0.011350 |
| XLOC_029944 | -                          | 0.002372 |
| XLOC_030014 | AZIN2                      | 0.023280 |

|             |                    |          |
|-------------|--------------------|----------|
| XLOC_030054 | MYCL               | 0.002372 |
| XLOC_030079 | ENSSSCG00000003686 | 0.004177 |
| XLOC_030080 | EPB41L3            | 0.004177 |
| XLOC_030107 | NPC1               | 0.024202 |
| XLOC_030132 | ENSSSCG00000029762 | 0.024202 |
| XLOC_030143 | ENSSSCG00000025209 | 0.002372 |
| XLOC_030151 | ADGRL2             | 0.002372 |
| XLOC_030153 | IFI44              | 0.007395 |
| XLOC_030233 | ZYG11A             | 0.002372 |
| XLOC_030751 | -                  | 0.002372 |
| XLOC_031046 | -                  | 0.002372 |
| XLOC_031297 | -                  | 0.015000 |
| XLOC_031298 | -                  | 0.007395 |
| XLOC_031468 | EDN1               | 0.013835 |
| XLOC_031480 | GMPR               | 0.029810 |
| XLOC_031493 | SOX4               | 0.030613 |
| XLOC_031522 | ZNF322             | 0.007395 |
| XLOC_031574 | GABBR1             | 0.018305 |
| XLOC_031575 | UBD                | 0.007395 |
| XLOC_031680 | ANKS1A             | 0.026101 |
| XLOC_031710 | LRFN2              | 0.032252 |
| XLOC_031726 | -                  | 0.026101 |
| XLOC_031781 | CRISP3             | 0.015000 |
| XLOC_031804 | FAH                | 0.039463 |
| XLOC_031808 | MESDC2             | 0.043224 |
| XLOC_031889 | HEXA               | 0.016103 |
| XLOC_031892 | PKM                | 0.020320 |
| XLOC_031916 | EGLN3              | 0.002372 |
| XLOC_031933 | GZMH               | 0.013835 |
| XLOC_031960 | CEBPE              | 0.010072 |
| XLOC_032093 | PSEN1              | 0.011350 |
| XLOC_032113 | FOS                | 0.002372 |
| XLOC_032271 | SERPINB1           | 0.002372 |
| XLOC_032314 | ENSSSCG00000020858 | 0.004177 |
| XLOC_032321 | MBOAT1             | 0.002372 |
| XLOC_032460 | AIF1               | 0.002372 |
| XLOC_032464 | TNFA               | 0.002372 |
| XLOC_032566 | ETV7               | 0.008746 |
| XLOC_032593 | TREML1             | 0.004177 |
| XLOC_032647 | TNFRSF21           | 0.042609 |
| XLOC_032732 | C7H15orf38         | 0.005845 |
| XLOC_032744 | SCAPER             | 0.046618 |
| XLOC_032809 | GZMB,GZMH          | 0.002372 |
| XLOC_032851 | TRDC               | 0.002372 |

|             |                    |          |
|-------------|--------------------|----------|
| XLOC_032857 | TRADV8             | 0.002372 |
| XLOC_032943 | SLCO3A1            | 0.002372 |
| XLOC_032958 | ATP6V1D            | 0.034852 |
| XLOC_032985 | ENSSSCG00000022178 | 0.002372 |
| XLOC_033008 | -                  | 0.021314 |
| XLOC_033030 | -                  | 0.045290 |
| XLOC_033033 | GALC               | 0.048740 |
| XLOC_033059 | ENSSSCG00000002452 | 0.002372 |
| XLOC_033087 | BCL11B             | 0.041848 |
| XLOC_033093 | WARS               | 0.024202 |
| XLOC_033094 | CDC42BPB           | 0.013835 |
| XLOC_033257 | -                  | 0.023280 |
| XLOC_034070 | JAKMIP1            | 0.010072 |
| XLOC_034099 | ENSSSCG00000028448 | 0.010072 |
| XLOC_034114 | RBPJ               | 0.012580 |
| XLOC_034124 | ENSSSCG00000008769 | 0.015000 |
| XLOC_034206 | TMEM144            | 0.004177 |
| XLOC_034226 | HOPX               | 0.004177 |
| XLOC_034259 | UTP3               | 0.048740 |
| XLOC_034261 | MOB1B              | 0.039463 |
| XLOC_034263 | SLC4A4             | 0.002372 |
| XLOC_034293 | U1                 | 0.016103 |
| XLOC_034376 | TRPC3              | 0.002372 |
| XLOC_034380 | ANXA5              | 0.010072 |
| XLOC_034391 | PDE5A              | 0.002372 |
| XLOC_034489 | HPSE               | 0.002372 |
| XLOC_034491 | ENSSSCG00000009239 | 0.002372 |
| XLOC_034565 | LYAR               | 0.019332 |
| XLOC_034584 | ENSSSCG00000023604 | 0.004177 |
| XLOC_034585 | -                  | 0.002372 |
| XLOC_034611 | TLR10              | 0.015000 |
| XLOC_034612 | TLR1,TLR6          | 0.042609 |
| XLOC_034624 | RBM47              | 0.007395 |
| XLOC_034633 | GNPDA2             | 0.002372 |
| XLOC_034707 | -                  | 0.048740 |
| XLOC_034748 | -                  | 0.002372 |
| XLOC_034758 | ALB                | 0.002372 |
| XLOC_034770 | AA                 | 0.002372 |
| XLOC_034776 | SCARB2             | 0.015000 |
| XLOC_034830 | GAB1               | 0.038749 |
| XLOC_034923 | SLC39A8            | 0.048740 |
| XLOC_034953 | ENSSSCG00000030548 | 0.010072 |
| XLOC_034964 | ENSSSCG00000009226 | 0.034852 |
| XLOC_034968 | PTPN13             | 0.002372 |

|             |                          |          |
|-------------|--------------------------|----------|
| XLOC_034972 | CDS1                     | 0.002372 |
| XLOC_034973 | AGPAT9                   | 0.019332 |
| XLOC_035238 | -                        | 0.039463 |
| XLOC_035732 | -                        | 0.044005 |
| XLOC_035741 | TPP1                     | 0.021314 |
| XLOC_035820 | FOLR1                    | 0.002372 |
| XLOC_035863 | CAPN5                    | 0.027994 |
| XLOC_035885 | -                        | 0.002372 |
| XLOC_035937 | ENDOD1                   | 0.049392 |
| XLOC_035970 | RAB39A                   | 0.007395 |
| XLOC_035981 | ZC3H12C                  | 0.002372 |
| XLOC_036011 | CADM1                    | 0.049392 |
| XLOC_036027 | CD3E                     | 0.002372 |
| XLOC_036050 | OAF                      | 0.005845 |
| XLOC_036082 | VWA5A                    | 0.004177 |
| XLOC_036169 | RAB7B                    | 0.016103 |
| XLOC_036170 | -                        | 0.002372 |
| XLOC_036171 | C1orf186                 | 0.002372 |
| XLOC_036179 | -                        | 0.013835 |
| XLOC_036189 | C4BPA,ENSSSCG00000015663 | 0.002372 |
| XLOC_036208 | GATAD1                   | 0.035659 |
| XLOC_036217 | GNG11                    | 0.002372 |
| XLOC_036253 | -                        | 0.026101 |
| XLOC_036293 | HGF                      | 0.002372 |
| XLOC_036332 | ENSSSCG00000027699       | 0.031419 |
| XLOC_036347 | -                        | 0.027994 |
| XLOC_036419 | RGL1                     | 0.004177 |
| XLOC_036432 | PLA2G4A                  | 0.021314 |
| XLOC_036443 | ATF3                     | 0.002372 |
| XLOC_036593 | ENSSSCG00000014727       | 0.030613 |
| XLOC_036594 | HBE1                     | 0.010072 |
| XLOC_036607 | OR51E1                   | 0.002372 |
| XLOC_036683 | PAK1                     | 0.004177 |
| XLOC_036707 | SYTL2                    | 0.002372 |
| XLOC_036773 | CASP1,ENSSSCG00000014997 | 0.038059 |
| XLOC_036904 | ENSSSCG00000015200       | 0.005845 |
| XLOC_036948 | SOX13                    | 0.002372 |
| XLOC_036957 | LRRN2                    | 0.040229 |
| XLOC_036966 | SLC45A3                  | 0.002372 |
| XLOC_037017 | TFPI2                    | 0.004177 |
| XLOC_037026 | PON2                     | 0.027058 |
| XLOC_037040 | ETV1                     | 0.002372 |
| XLOC_037051 | TSPAN13                  | 0.002372 |



|             |                                                                         |          |
|-------------|-------------------------------------------------------------------------|----------|
| XLOC_037088 | CD36                                                                    | 0.017207 |
| XLOC_037122 | ENSSSCG00000023584,ENSSSC<br>G00000026913,ENSSSCG0000002<br>9596,TRGV11 | 0.005845 |
| XLOC_037123 | AMPH                                                                    | 0.004177 |
| XLOC_037125 | Y_R                                                                     | 0.023280 |
| XLOC_037149 | CHI3L1                                                                  | 0.002372 |
| XLOC_037156 | FASLG                                                                   | 0.019332 |
| XLOC_037196 | XPR1                                                                    | 0.002372 |
| XLOC_037208 | RSEL                                                                    | 0.005845 |
| XLOC_037214 | NCF2                                                                    | 0.033125 |
| XLOC_037235 | FLVCR1                                                                  | 0.015000 |
| XLOC_037259 | -                                                                       | 0.040229 |
| XLOC_037307 | -                                                                       | 0.002372 |
| XLOC_037604 | -                                                                       | 0.020320 |
| XLOC_037889 | -                                                                       | 0.002372 |
| XLOC_038083 | -                                                                       | 0.043224 |
| XLOC_038183 | -                                                                       | 0.020320 |
| XLOC_038283 | ALS2                                                                    | 0.027994 |
| XLOC_038373 | -                                                                       | 0.027058 |
| XLOC_038567 | -                                                                       | 0.036488 |
| XLOC_038672 | DAGLB                                                                   | 0.005845 |
| XLOC_038685 | ENSSSCG00000021949                                                      | 0.002372 |
| XLOC_038714 | ENSSSCG00000028099                                                      | 0.002372 |
| XLOC_038767 | ANG1,RSE4                                                               | 0.002372 |
| XLOC_038828 | ENSSSCG00000025390                                                      | 0.047338 |
| XLOC_038902 | CPNE2                                                                   | 0.004177 |
| XLOC_039051 | ASAP3                                                                   | 0.024202 |
| XLOC_039081 | -                                                                       | 0.045889 |
| XLOC_039085 | -                                                                       | 0.016103 |
| XLOC_039086 | -                                                                       | 0.007395 |
| XLOC_039087 | -                                                                       | 0.040229 |
| XLOC_039109 | GZMM                                                                    | 0.002372 |
| XLOC_039241 | -                                                                       | 0.047338 |
| XLOC_039369 | ENSSSCG00000028686                                                      | 0.041848 |
| XLOC_039706 | -                                                                       | 0.027058 |
| XLOC_040136 | ENSSSCG00000029802                                                      | 0.002372 |
| XLOC_040309 | ENSSSCG00000022360                                                      | 0.002372 |
| XLOC_040317 | -                                                                       | 0.041076 |
| XLOC_040352 | ENSSSCG00000022971                                                      | 0.031419 |
| XLOC_040495 | -                                                                       | 0.004177 |
| XLOC_040497 | RSE6                                                                    | 0.002372 |
| XLOC_040569 | -                                                                       | 0.002372 |

|             |                    |          |
|-------------|--------------------|----------|
| XLOC_040662 | DAPK2              | 0.011350 |
| XLOC_040793 | SERPINE1           | 0.002372 |
| XLOC_040957 | HMOX1              | 0.002372 |
| XLOC_040967 | -                  | 0.004177 |
| XLOC_040968 | UPP1               | 0.028943 |
| XLOC_040978 | SLC2A5             | 0.008746 |
| XLOC_040979 | -                  | 0.002372 |
| XLOC_040987 | ENSSSCG00000020872 | 0.021314 |
| XLOC_041085 | -                  | 0.032252 |
| XLOC_041111 | PTMA               | 0.047338 |
| XLOC_041120 | -                  | 0.020320 |
| XLOC_041128 | PROS1              | 0.002372 |
| XLOC_041169 | -                  | 0.005845 |
| XLOC_041230 | -                  | 0.044653 |
| XLOC_041231 | -                  | 0.027994 |
| XLOC_041268 | -                  | 0.002372 |
| XLOC_041413 | -                  | 0.008746 |
| XLOC_041496 | CKB                | 0.002372 |
| XLOC_041501 | ENSSSCG00000026336 | 0.002372 |
| XLOC_041512 | SGIP1              | 0.035659 |
| XLOC_041613 | SLC37A3            | 0.038059 |
| XLOC_041623 | -                  | 0.044653 |
| XLOC_041668 | HIATL1             | 0.012580 |
| XLOC_041687 | ENSSSCG00000029732 | 0.002372 |
| XLOC_041737 | -                  | 0.002372 |
| XLOC_041875 | -                  | 0.039463 |
| XLOC_041922 | -                  | 0.029810 |
| XLOC_041962 | ENSSSCG00000021402 | 0.002372 |
| XLOC_042011 | WDR73              | 0.008746 |
| XLOC_042052 | ENSSSCG00000021766 | 0.016103 |
| XLOC_042177 | -                  | 0.002372 |
| XLOC_042222 | -                  | 0.038749 |
| XLOC_042272 | -                  | 0.022312 |
| XLOC_042316 | EMR4               | 0.017207 |
| XLOC_042323 | S100B              | 0.004177 |
| XLOC_042483 | APOBR              | 0.022312 |
| XLOC_042590 | CSF2RA             | 0.002372 |
| XLOC_042606 | IGHE               | 0.045889 |
| XLOC_042621 | -                  | 0.011350 |
| XLOC_042713 | C3AR1              | 0.002372 |
| XLOC_042757 | SNRPN              | 0.038749 |
| XLOC_042819 | PRSS57             | 0.027058 |
| XLOC_042822 | -                  | 0.023280 |
| XLOC_043048 | -                  | 0.002372 |

|             |                            |          |
|-------------|----------------------------|----------|
| XLOC_043100 | -                          | 0.004177 |
| XLOC_043210 | ENSSSCG00000001071         | 0.033125 |
| XLOC_043278 | ENSSSCG00000025003         | 0.040229 |
| XLOC_043402 | NRP2                       | 0.004177 |
| XLOC_043491 | ABHD10                     | 0.011350 |
| XLOC_043495 | DSC2                       | 0.032252 |
| XLOC_043601 | ENSSSCG00000021096         | 0.031419 |
| XLOC_043669 | -                          | 0.002372 |
| XLOC_043886 | STAT1                      | 0.022312 |
| XLOC_044313 | BMX                        | 0.027058 |
| XLOC_044370 | GK                         | 0.002372 |
| XLOC_044394 | CYBB,XK                    | 0.004177 |
| XLOC_044401 | ENSSSCG00000012238         | 0.020320 |
| XLOC_044406 | ATP6AP2                    | 0.035659 |
| XLOC_044433 | CFP,CH242-69I19.6,ELK1,UCT | 0.039463 |
| XLOC_044461 | CLCN5                      | 0.005845 |
| XLOC_044476 | TSPYL2                     | 0.004177 |
| XLOC_044506 | -                          | 0.002372 |
| XLOC_044508 | VSIG4                      | 0.002372 |
| XLOC_044509 | HEPH                       | 0.031419 |
| XLOC_044517 | PJA1                       | 0.007395 |
| XLOC_044547 | ENSSSCG00000012411         | 0.049392 |
| XLOC_044572 | ENSSSCG00000012439         | 0.037305 |
| XLOC_044582 | -                          | 0.018305 |
| XLOC_044641 | BHLHB9,GPRASP2             | 0.005845 |
| XLOC_044718 | -                          | 0.031419 |
| XLOC_044735 | SH2D1A                     | 0.010072 |
| XLOC_044921 | SCML2                      | 0.020320 |
| XLOC_044958 | CXorf21                    | 0.036488 |
| XLOC_044968 | TMEM47                     | 0.002372 |
| XLOC_045005 | MAOB                       | 0.002372 |
| XLOC_045097 | ARHGEF9                    | 0.015000 |
| XLOC_045103 | ENSSSCG00000028241         | 0.002372 |
| XLOC_045287 | LONRF3                     | 0.002372 |
| XLOC_045292 | KLHL13                     | 0.005845 |
| XLOC_045393 | L1CAM                      | 0.025115 |
| XLOC_045420 | -                          | 0.010072 |

---

Supplementary Table 2. List of differentially expressed genes identified in dying group

| Gene XLOC Number | Gene Symbol/ID                         | Adjust p |
|------------------|----------------------------------------|----------|
| XLOC_000001      | DLL1                                   | 0.002372 |
| XLOC_000013      | ENSSSCG00000004024                     | 0.024202 |
| XLOC_000032      | -                                      | 0.008746 |
| XLOC_000042      | ENSSSCG000000024378                    | 0.002372 |
| XLOC_000062      | ENSSSCG00000004082,ENSSSCG000000021273 | 0.012580 |
| XLOC_000070      | ULBP1                                  | 0.002372 |
| XLOC_000108      | IFNGR1                                 | 0.002372 |
| XLOC_000116      | PDE7B                                  | 0.012580 |
| XLOC_000117      | AHI1                                   | 0.016103 |
| XLOC_000146      | SAMD3                                  | 0.002372 |
| XLOC_000151      | THEMIS                                 | 0.005845 |
| XLOC_000152      | -                                      | 0.002372 |
| XLOC_000192      | FAM135A                                | 0.002372 |
| XLOC_000195      | OGFRL1                                 | 0.021314 |
| XLOC_000211      | SLC35A1                                | 0.002372 |
| XLOC_000262      | CDC40                                  | 0.011350 |
| XLOC_000273      | MARCKS                                 | 0.002372 |
| XLOC_000283      | IBTK                                   | 0.017207 |
| XLOC_000284      | FAM46A                                 | 0.004177 |
| XLOC_000296      | U6                                     | 0.002372 |
| XLOC_000305      | SETBP1                                 | 0.030613 |
| XLOC_000342      | OAZ2                                   | 0.011350 |
| XLOC_000357      | RORA                                   | 0.002372 |
| XLOC_000359      | ANXA2                                  | 0.002372 |
| XLOC_000360      | ENSSSCG000000004582                    | 0.046618 |
| XLOC_000362      | MYO1E                                  | 0.010072 |
| XLOC_000382      | -                                      | 0.032252 |
| XLOC_000405      | -                                      | 0.034852 |
| XLOC_000447      | ELL3                                   | 0.038059 |
| XLOC_000507      | RASGRP1                                | 0.002372 |
| XLOC_000519      | SCG5                                   | 0.002372 |
| XLOC_000544      | OTUD7A                                 | 0.025115 |
| XLOC_000563      | ENSSSCG000000004870                    | 0.004177 |
| XLOC_000579      | ENSSSCG000000021694,SERPINB11          | 0.002372 |
| XLOC_000581      | -                                      | 0.002372 |
| XLOC_000582      | SERPINB2                               | 0.010072 |
| XLOC_000615      | SMAD6                                  | 0.002372 |
| XLOC_000643      | TRAPPC6B                               | 0.017207 |
| XLOC_000690      | LGALS3                                 | 0.002372 |

|             |                         |          |
|-------------|-------------------------|----------|
| XLOC_000694 | PELI2                   | 0.002372 |
| XLOC_000701 | ENSSSCG00000022299      | 0.028943 |
| XLOC_000716 | PKC                     | 0.008746 |
| XLOC_000777 | INTERFERON-BETA-1       | 0.002372 |
| XLOC_000784 | ADFP,ENSSSCG00000005172 | 0.002372 |
| XLOC_000788 | PSIP1                   | 0.004177 |
| XLOC_000789 | TTC39B                  | 0.002372 |
| XLOC_000840 | ENSSSCG00000020904      | 0.041848 |
| XLOC_000841 | ENSSSCG00000005260      | 0.005845 |
| XLOC_000845 | ANXA1                   | 0.002372 |
| XLOC_000858 | PSAT1                   | 0.002372 |
| XLOC_000870 | RUSC2                   | 0.002372 |
| XLOC_000902 | TDRD7                   | 0.004177 |
| XLOC_000916 | SEC61B                  | 0.042609 |
| XLOC_000947 | FKTN                    | 0.021314 |
| XLOC_000950 | ENSSSCG00000005431      | 0.045889 |
| XLOC_000962 | ENSSSCG00000005451      | 0.008746 |
| XLOC_000966 | GNG10                   | 0.035659 |
| XLOC_000970 | KIAA1958                | 0.011350 |
| XLOC_000976 | ENSSSCG00000029221      | 0.002372 |
| XLOC_000994 | TLR4                    | 0.002372 |
| XLOC_001044 | NEK6                    | 0.008746 |
| XLOC_001067 | STXBP1                  | 0.002372 |
| XLOC_001074 | C9orf16,LCN2            | 0.025115 |
| XLOC_001082 | SPTAN1                  | 0.022312 |
| XLOC_001097 | TOR1B                   | 0.002372 |
| XLOC_001129 | COL5A1                  | 0.010072 |
| XLOC_001130 | FCN2                    | 0.002372 |
| XLOC_001131 | OLFM1                   | 0.005845 |
| XLOC_001145 | PARD6G                  | 0.028943 |
| XLOC_001204 | THBS2                   | 0.033125 |
| XLOC_001212 | AGPAT4                  | 0.048740 |
| XLOC_001230 | DYNLT1                  | 0.002372 |
| XLOC_001231 | SYTL3                   | 0.002372 |
| XLOC_001238 | SNX9                    | 0.033995 |
| XLOC_001246 | ENSSSCG00000004072      | 0.019332 |
| XLOC_001247 | ENSSSCG00000025352      | 0.022312 |
| XLOC_001252 | SYNE1                   | 0.002372 |
| XLOC_001258 | ARMT1                   | 0.028943 |
| XLOC_001263 | LRP11                   | 0.049392 |
| XLOC_001278 | RAB32                   | 0.011350 |
| XLOC_001281 | ENSSSCG00000004123      | 0.020320 |
| XLOC_001282 | -                       | 0.002372 |

|             |                                       |          |
|-------------|---------------------------------------|----------|
| XLOC_001283 | ENSSSCG00000026681                    | 0.010072 |
| XLOC_001285 | STX11                                 | 0.002372 |
| XLOC_001299 | -                                     | 0.018305 |
| XLOC_001305 | TNFAIP3                               | 0.002372 |
| XLOC_001352 | -                                     | 0.040229 |
| XLOC_001361 | SMPDL3A                               | 0.002372 |
| XLOC_001374 | NUS1                                  | 0.005845 |
| XLOC_001376 | DCBLD1                                | 0.004177 |
| XLOC_001424 | RRAGD                                 | 0.007395 |
| XLOC_001429 | -                                     | 0.002372 |
| XLOC_001466 | GL                                    | 0.033995 |
| XLOC_001509 | FAM26F                                | 0.002372 |
| XLOC_001541 | PSTPIP2                               | 0.002372 |
| XLOC_001585 | DAPK2                                 | 0.002372 |
| XLOC_001617 | AQP9                                  | 0.002372 |
| XLOC_001632 | MAPK6                                 | 0.008746 |
| XLOC_001651 | SEMA6D                                | 0.002372 |
| XLOC_001654 | SLC28A2                               | 0.002372 |
| XLOC_001658 | SORD                                  | 0.022312 |
| XLOC_001675 | ENSSSCG00000004705                    | 0.010072 |
| XLOC_001688 | ENSSSCG00000020666                    | 0.029810 |
| XLOC_001690 | ENSSSCG00000024969                    | 0.024202 |
| XLOC_001723 | THBS1                                 | 0.002372 |
| XLOC_001725 | SPRED1                                | 0.002372 |
| XLOC_001784 | -                                     | 0.002372 |
| XLOC_001796 | SERPINB8                              | 0.002372 |
| XLOC_001797 | SERPINB10                             | 0.002372 |
| XLOC_001802 | TNFRSF11A                             | 0.004177 |
| XLOC_001859 | PNN                                   | 0.015000 |
| XLOC_001892 | GNG2                                  | 0.021314 |
| XLOC_001933 | ISG20                                 | 0.002372 |
| XLOC_002028 | MAMDC2                                | 0.002372 |
| XLOC_002033 | -                                     | 0.043224 |
| XLOC_002035 | ENSSSCG00000024257                    | 0.002372 |
| XLOC_002062 | SIT1                                  | 0.008746 |
| XLOC_002063 | Rse_MRP                               | 0.004177 |
| XLOC_002065 | TPM2                                  | 0.048740 |
| XLOC_002099 | CORO2A,TBC1D2                         | 0.010072 |
| XLOC_002100 | ENSSSCG00000005377,ENSSSCG00000027558 | 0.002372 |
| XLOC_002121 | ENSSSCG00000005423                    | 0.029810 |
| XLOC_002126 | KLF4                                  | 0.002372 |
| XLOC_002140 | TRX1                                  | 0.028943 |
| XLOC_002158 | ENSSSCG00000005477                    | 0.029810 |

|             |                    |          |
|-------------|--------------------|----------|
| XLOC_002163 | RGS3               | 0.037305 |
| XLOC_002175 | TNFRSF8            | 0.029810 |
| XLOC_002183 | ENSSSCG00000028117 | 0.022312 |
| XLOC_002184 | MEGF9              | 0.002372 |
| XLOC_002234 | STRBP              | 0.023280 |
| XLOC_002258 | FAM129B            | 0.002372 |
| XLOC_002290 | DYT1               | 0.002372 |
| XLOC_002312 | SLC2A6             | 0.041848 |
| XLOC_002320 | FCN1               | 0.002372 |
| XLOC_002417 | -                  | 0.015000 |
| XLOC_002521 | -                  | 0.002372 |
| XLOC_002611 | -                  | 0.027994 |
| XLOC_002619 | -                  | 0.013835 |
| XLOC_002631 | -                  | 0.002372 |
| XLOC_002635 | -                  | 0.002372 |
| XLOC_002640 | -                  | 0.026101 |
| XLOC_002658 | -                  | 0.002372 |
| XLOC_002685 | -                  | 0.010072 |
| XLOC_002756 | -                  | 0.007395 |
| XLOC_002776 | -                  | 0.041848 |
| XLOC_002793 | -                  | 0.002372 |
| XLOC_002849 | -                  | 0.002372 |
| XLOC_002851 | -                  | 0.021314 |
| XLOC_002863 | -                  | 0.029810 |
| XLOC_002948 | -                  | 0.005845 |
| XLOC_003092 | -                  | 0.004177 |
| XLOC_003097 | -                  | 0.002372 |
| XLOC_003118 | -                  | 0.004177 |
| XLOC_003119 | -                  | 0.008746 |
| XLOC_003141 | -                  | 0.033995 |
| XLOC_003144 | -                  | 0.040229 |
| XLOC_003328 | -                  | 0.013835 |
| XLOC_003330 | -                  | 0.002372 |
| XLOC_003347 | -                  | 0.042609 |
| XLOC_003353 | -                  | 0.045290 |
| XLOC_003355 | -                  | 0.027058 |
| XLOC_003356 | -                  | 0.044653 |
| XLOC_003492 | -                  | 0.007395 |
| XLOC_003500 | -                  | 0.005845 |
| XLOC_003508 | -                  | 0.002372 |
| XLOC_003522 | -                  | 0.002372 |
| XLOC_003532 | -                  | 0.002372 |
| XLOC_003539 | -                  | 0.002372 |
| XLOC_003606 | -                  | 0.002372 |

|             |                               |          |
|-------------|-------------------------------|----------|
| XLOC_003607 | -                             | 0.023280 |
| XLOC_003609 | -                             | 0.007395 |
| XLOC_003610 | -                             | 0.022312 |
| XLOC_003639 | -                             | 0.034852 |
| XLOC_003700 | -                             | 0.002372 |
| XLOC_003794 | -                             | 0.026101 |
| XLOC_003796 | -                             | 0.005845 |
| XLOC_003811 | -                             | 0.002372 |
| XLOC_003812 | -                             | 0.002372 |
| XLOC_003846 | -                             | 0.011350 |
| XLOC_003858 | -                             | 0.041848 |
| XLOC_003926 | -                             | 0.048740 |
| XLOC_003945 | DEGS1                         | 0.002372 |
| XLOC_003946 | CNIH4                         | 0.002372 |
| XLOC_003955 | TMEM63A                       | 0.002372 |
| XLOC_003986 | CFH                           | 0.015000 |
| XLOC_003991 | DENND1B                       | 0.002372 |
| XLOC_004000 | ENSSSCG00000010915            | 0.002372 |
| XLOC_004001 | -                             | 0.008746 |
| XLOC_004019 | FBP1                          | 0.002372 |
| XLOC_004051 | AQP3                          | 0.002372 |
| XLOC_004059 | DDX58                         | 0.042609 |
| XLOC_004068 | C9orf72                       | 0.002372 |
| XLOC_004089 | TMEM236                       | 0.016103 |
| XLOC_004114 | MPP7                          | 0.011350 |
| XLOC_004126 | ARHGAP21                      | 0.005845 |
| XLOC_004168 | ENSSSCG00000011129            | 0.002372 |
| XLOC_004170 | ENSSSCG00000021720,SFMBT<br>2 | 0.045889 |
| XLOC_004172 | PRKCQ                         | 0.013835 |
| XLOC_004173 | PFKFB3                        | 0.002372 |
| XLOC_004196 | KLF6                          | 0.027994 |
| XLOC_004225 | RGS1                          | 0.030613 |
| XLOC_004252 | HLX                           | 0.002372 |
| XLOC_004283 | EH                            | 0.046618 |
| XLOC_004285 | PARP1                         | 0.010072 |
| XLOC_004316 | ASPM                          | 0.018305 |
| XLOC_004323 | -                             | 0.021314 |
| XLOC_004328 | CAMSAP2                       | 0.026101 |
| XLOC_004340 | ENSSSCG00000010913,V1         | 0.011350 |
| XLOC_004342 | V1                            | 0.002372 |
| XLOC_004365 | DAPK1                         | 0.031419 |
| XLOC_004367 | ENSSSCG00000010949            | 0.011350 |



|             |                           |          |
|-------------|---------------------------|----------|
| XLOC_004382 | SIGMAR1                   | 0.027994 |
| XLOC_004411 | ENSSSCG00000011019,MAP3K8 | 0.002372 |
| XLOC_004418 | ENSSSCG00000020757        | 0.016103 |
| XLOC_004458 | ENSSSCG00000011076        | 0.002372 |
| XLOC_004477 | NRP1                      | 0.002372 |
| XLOC_004492 | GATA3                     | 0.002372 |
| XLOC_004495 | ENSSSCG00000024480        | 0.011350 |
| XLOC_004606 | -                         | 0.023280 |
| XLOC_004791 | -                         | 0.016103 |
| XLOC_004808 | -                         | 0.005845 |
| XLOC_004847 | -                         | 0.002372 |
| XLOC_004866 | -                         | 0.002372 |
| XLOC_004867 | -                         | 0.002372 |
| XLOC_004871 | -                         | 0.002372 |
| XLOC_004873 | -                         | 0.023280 |
| XLOC_004885 | -                         | 0.045889 |
| XLOC_004981 | -                         | 0.002372 |
| XLOC_004983 | -                         | 0.012580 |
| XLOC_005126 | -                         | 0.030613 |
| XLOC_005174 | SLC46A3                   | 0.013835 |
| XLOC_005184 | ALOX5AP                   | 0.002372 |
| XLOC_005244 | LPAR6                     | 0.043224 |
| XLOC_005250 | KIAA0226L                 | 0.008746 |
| XLOC_005299 | ENSSSCG00000009469        | 0.002372 |
| XLOC_005325 | DJC3                      | 0.024202 |
| XLOC_005356 | TNFSF13B                  | 0.015000 |
| XLOC_005379 | ENSSSCG00000009574        | 0.035659 |
| XLOC_005401 | ENSSSCG00000009293        | 0.018305 |
| XLOC_005405 | SHISA2                    | 0.041076 |
| XLOC_005456 | -                         | 0.031419 |
| XLOC_005459 | FOXO1                     | 0.023280 |
| XLOC_005472 | CDADC1                    | 0.002372 |
| XLOC_005530 | -                         | 0.002372 |
| XLOC_005537 | -                         | 0.027058 |
| XLOC_005550 | SPRY2                     | 0.005845 |
| XLOC_005623 | RAB20                     | 0.002372 |
| XLOC_005624 | -                         | 0.018305 |
| XLOC_005629 | LAMP1                     | 0.002372 |
| XLOC_005637 | GAS6                      | 0.004177 |
| XLOC_005662 | -                         | 0.036488 |
| XLOC_005829 | -                         | 0.015000 |
| XLOC_005841 | -                         | 0.002372 |
| XLOC_005845 | -                         | 0.011350 |

|             |                    |          |
|-------------|--------------------|----------|
| XLOC_005862 | -                  | 0.027058 |
| XLOC_006067 | METRNL             | 0.002372 |
| XLOC_006068 | -                  | 0.028943 |
| XLOC_006072 | SLC16A3            | 0.022312 |
| XLOC_006090 | TBC1D16            | 0.007395 |
| XLOC_006094 | TIMP-2             | 0.002372 |
| XLOC_006097 | -                  | 0.002372 |
| XLOC_006099 | SCAR16             | 0.034852 |
| XLOC_006109 | RHBDF2             | 0.002372 |
| XLOC_006124 | GALK1              | 0.002372 |
| XLOC_006141 | CD300LF            | 0.005845 |
| XLOC_006143 | ENSSSCG00000020967 | 0.024202 |
| XLOC_006144 | CD300C             | 0.002372 |
| XLOC_006148 | -                  | 0.020320 |
| XLOC_006164 | ARSG,SLC16A6       | 0.002372 |
| XLOC_006206 | PLEKHM1            | 0.018305 |
| XLOC_006227 | GRN                | 0.002372 |
| XLOC_006286 | CCR7               | 0.020320 |
| XLOC_006289 | TOP2A              | 0.007395 |
| XLOC_006301 | ENSSSCG00000017492 | 0.002372 |
| XLOC_006320 | TBX21              | 0.027994 |
| XLOC_006461 | CCL3L1             | 0.002372 |
| XLOC_006465 | CCL23              | 0.002372 |
| XLOC_006466 | CCL16              | 0.002372 |
| XLOC_006467 | CCL5               | 0.002372 |
| XLOC_006484 | CCL8               | 0.002372 |
| XLOC_006485 | CCL2               | 0.002372 |
| XLOC_006506 | ENSSSCG00000017754 | 0.002372 |
| XLOC_006539 | -                  | 0.005845 |
| XLOC_006581 | SPNS3              | 0.011350 |
| XLOC_006591 | CAMTA2             | 0.015000 |
| XLOC_006596 | CXCL16             | 0.002372 |
| XLOC_006631 | ENSSSCG00000017962 | 0.004177 |
| XLOC_006635 | CHD3               | 0.002372 |
| XLOC_006696 | WDR45L             | 0.030613 |
| XLOC_006700 | -                  | 0.033995 |
| XLOC_006704 | FASN               | 0.002372 |
| XLOC_006705 | ENSSSCG00000023044 | 0.007395 |
| XLOC_006717 | ENSSSCG00000017156 | 0.013835 |
| XLOC_006732 | PRCD               | 0.027994 |
| XLOC_006734 | SPHK1              | 0.005845 |
| XLOC_006746 | ITGB4              | 0.008746 |
| XLOC_006766 | -                  | 0.016103 |
| XLOC_006770 | TTYH2              | 0.048079 |

|             |                    |          |
|-------------|--------------------|----------|
| XLOC_006793 | AXIN2              | 0.008746 |
| XLOC_006842 | SLC4A1             | 0.031419 |
| XLOC_006856 | VAT1               | 0.002372 |
| XLOC_006866 | RAMP2              | 0.002372 |
| XLOC_006872 | HSD17B1,GLU        | 0.011350 |
| XLOC_006902 | KRT23              | 0.041076 |
| XLOC_006907 | RARA               | 0.008746 |
| XLOC_006965 | TMEM92             | 0.002372 |
| XLOC_006993 | SCPEP1             | 0.002372 |
| XLOC_007043 | SNORA11            | 0.027994 |
| XLOC_007051 | CCL4               | 0.002372 |
| XLOC_007070 | CDK5R1             | 0.025115 |
| XLOC_007074 | ADAP2              | 0.002372 |
| XLOC_007085 | WSB1               | 0.002372 |
| XLOC_007086 | NOS2               | 0.002372 |
| XLOC_007113 | ABHD15             | 0.045889 |
| XLOC_007130 | FAM101B            | 0.002372 |
| XLOC_007135 | RILP,SCARF1        | 0.020320 |
| XLOC_007144 | CLUH               | 0.035659 |
| XLOC_007163 | TAX1BP3            | 0.005845 |
| XLOC_007164 | ENSSSCG00000017868 | 0.045889 |
| XLOC_007180 | XAF1               | 0.002372 |
| XLOC_007186 | WSCD1              | 0.002372 |
| XLOC_007198 | PLD2               | 0.041848 |
| XLOC_007200 | ZMYND15            | 0.002372 |
| XLOC_007210 | BCL6B              | 0.002372 |
| XLOC_007220 | ENSSSCG00000025782 | 0.002372 |
| XLOC_007344 | -                  | 0.002372 |
| XLOC_007346 | -                  | 0.036488 |
| XLOC_007347 | -                  | 0.002372 |
| XLOC_007356 | -                  | 0.021314 |
| XLOC_007445 | -                  | 0.004177 |
| XLOC_007446 | -                  | 0.002372 |
| XLOC_007486 | -                  | 0.002372 |
| XLOC_007527 | -                  | 0.021314 |
| XLOC_007626 | -                  | 0.002372 |
| XLOC_007644 | -                  | 0.002372 |
| XLOC_007658 | -                  | 0.002372 |
| XLOC_007701 | -                  | 0.002372 |
| XLOC_007702 | -                  | 0.002372 |
| XLOC_007703 | -                  | 0.002372 |
| XLOC_007706 | -                  | 0.008746 |
| XLOC_007813 | -                  | 0.041076 |
| XLOC_007814 | -                  | 0.038059 |

|             |                    |          |
|-------------|--------------------|----------|
| XLOC_007815 | -                  | 0.044653 |
| XLOC_007854 | -                  | 0.016103 |
| XLOC_007974 | CCRL2              | 0.002372 |
| XLOC_007978 | PTH1R              | 0.002372 |
| XLOC_008068 | -                  | 0.046618 |
| XLOC_008114 | BHLHE40            | 0.002372 |
| XLOC_008154 | ENSSSCG00000028582 | 0.027994 |
| XLOC_008157 | ENSSSCG00000011600 | 0.002372 |
| XLOC_008183 | -                  | 0.002372 |
| XLOC_008184 | DJC13              | 0.021314 |
| XLOC_008198 | CEP63              | 0.013835 |
| XLOC_008214 | MRAS               | 0.024202 |
| XLOC_008230 | RASA2              | 0.007395 |
| XLOC_008234 | ENSSSCG00000011676 | 0.025115 |
| XLOC_008251 | RNF13              | 0.004177 |
| XLOC_008261 | P2RY1              | 0.021314 |
| XLOC_008279 | ENSSSCG00000027556 | 0.024202 |
| XLOC_008283 | MFSD1              | 0.002372 |
| XLOC_008288 | -                  | 0.010072 |
| XLOC_008299 | -                  | 0.002372 |
| XLOC_008306 | -                  | 0.002372 |
| XLOC_008309 | -                  | 0.047338 |
| XLOC_008310 | PKC                | 0.004177 |
| XLOC_008396 | -                  | 0.013835 |
| XLOC_008402 | IL1RAP             | 0.002372 |
| XLOC_008410 | HES1               | 0.007395 |
| XLOC_008438 | OSBPL11            | 0.002372 |
| XLOC_008445 | -                  | 0.044653 |
| XLOC_008448 | DIRC2              | 0.011350 |
| XLOC_008466 | -                  | 0.004177 |
| XLOC_008468 | TMEM39A            | 0.024202 |
| XLOC_008496 | ENSSSCG00000011935 | 0.020320 |
| XLOC_008506 | -                  | 0.002372 |
| XLOC_008507 | -                  | 0.002372 |
| XLOC_008510 | -                  | 0.002372 |
| XLOC_008533 | CLDND1             | 0.043224 |
| XLOC_008556 | GBE1               | 0.039463 |
| XLOC_008562 | ENSSSCG00000012006 | 0.002372 |
| XLOC_008586 | BACH1              | 0.013835 |
| XLOC_008635 | PFKL               | 0.026101 |
| XLOC_008658 | -                  | 0.002372 |
| XLOC_008660 | -                  | 0.002372 |
| XLOC_008665 | ANKRD28            | 0.002372 |
| XLOC_008698 | -                  | 0.011350 |

|             |                           |          |
|-------------|---------------------------|----------|
| XLOC_008737 | CX3CR1                    | 0.005845 |
| XLOC_008772 | CCR1                      | 0.002372 |
| XLOC_008774 | LTF                       | 0.002372 |
| XLOC_008809 | ENSSSCG00000011361        | 0.023280 |
| XLOC_008812 | SLC25A20                  | 0.002372 |
| XLOC_008826 | UBA7                      | 0.025115 |
| XLOC_008833 | HYAL2                     | 0.019332 |
| XLOC_008840 | MAPKAPK3                  | 0.002372 |
| XLOC_008843 | MANF                      | 0.016103 |
| XLOC_008861 | ALAS1                     | 0.010072 |
| XLOC_008872 | TKT                       | 0.002372 |
| XLOC_008885 | ARHGEF3                   | 0.002372 |
| XLOC_008955 | -                         | 0.041848 |
| XLOC_008984 | SYN2                      | 0.047338 |
| XLOC_008995 | ENSSSCG00000029810        | 0.020320 |
| XLOC_009004 | FBLN2                     | 0.038059 |
| XLOC_009030 | ACPP                      | 0.010072 |
| XLOC_009109 | P2RY13                    | 0.002372 |
| XLOC_009120 | SLC33A1                   | 0.010072 |
| XLOC_009136 | ENSSSCG00000027790        | 0.019332 |
| XLOC_009175 | ENSSSCG00000011752        | 0.002372 |
| XLOC_009178 | NCEH1                     | 0.002372 |
| XLOC_009185 | -                         | 0.002372 |
| XLOC_009197 | B3GNT5                    | 0.011350 |
| XLOC_009229 | BCL6                      | 0.005845 |
| XLOC_009247 | ATP13A3                   | 0.034852 |
| XLOC_009279 | PDIA5                     | 0.002372 |
| XLOC_009282 | ENSSSCG00000028575        | 0.039463 |
| XLOC_009289 | ENSSSCG00000027867        | 0.002372 |
| XLOC_009295 | EAF2                      | 0.002372 |
| XLOC_009306 | CD80                      | 0.002372 |
| XLOC_009322 | ATP6V1A,GRAMD1C           | 0.013835 |
| XLOC_009342 | TRAT1                     | 0.008746 |
| XLOC_009350 | ALCAM                     | 0.032252 |
| XLOC_009355 | SNORA18                   | 0.020320 |
| XLOC_009357 | NFKBIZ,NXPE3              | 0.002372 |
| XLOC_009383 | GPR15                     | 0.004177 |
| XLOC_009401 | CRYBG3,ENSSSCG00000022895 | 0.002372 |
| XLOC_009414 | ENSSSCG00000029384        | 0.041076 |
| XLOC_009421 | BTG3                      | 0.002372 |
| XLOC_009422 | C21orf91                  | 0.002372 |
| XLOC_009454 | TIAM1                     | 0.030613 |
| XLOC_009468 | ENSSSCG00000024614        | 0.031419 |

|             |                    |          |
|-------------|--------------------|----------|
| XLOC_009489 | -                  | 0.048079 |
| XLOC_009518 | TRPM2              | 0.030613 |
| XLOC_009535 | LSS                | 0.007395 |
| XLOC_009556 | -                  | 0.015000 |
| XLOC_009559 | -                  | 0.048740 |
| XLOC_009700 | -                  | 0.002372 |
| XLOC_009825 | -                  | 0.029810 |
| XLOC_009866 | -                  | 0.002372 |
| XLOC_009885 | -                  | 0.002372 |
| XLOC_010021 | -                  | 0.031419 |
| XLOC_010279 | -                  | 0.004177 |
| XLOC_010288 | -                  | 0.005845 |
| XLOC_010462 | -                  | 0.047338 |
| XLOC_010474 | -                  | 0.002372 |
| XLOC_010590 | -                  | 0.043224 |
| XLOC_010636 | -                  | 0.002372 |
| XLOC_010667 | -                  | 0.002372 |
| XLOC_010764 | -                  | 0.038749 |
| XLOC_010848 | -                  | 0.016103 |
| XLOC_010867 | -                  | 0.046618 |
| XLOC_010879 | -                  | 0.002372 |
| XLOC_010882 | -                  | 0.023280 |
| XLOC_010883 | -                  | 0.034852 |
| XLOC_010908 | -                  | 0.032252 |
| XLOC_010913 | -                  | 0.002372 |
| XLOC_010915 | -                  | 0.002372 |
| XLOC_010917 | -                  | 0.016103 |
| XLOC_010928 | -                  | 0.002372 |
| XLOC_010935 | -                  | 0.002372 |
| XLOC_010936 | -                  | 0.010072 |
| XLOC_010969 | -                  | 0.023280 |
| XLOC_010987 | -                  | 0.002372 |
| XLOC_011035 | DMTN               | 0.002372 |
| XLOC_011044 | ENSSSCG00000009627 | 0.002372 |
| XLOC_011052 | ADAM28             | 0.005845 |
| XLOC_011081 | ENSSSCG00000027568 | 0.029810 |
| XLOC_011125 | ENSSSCG00000009761 | 0.044005 |
| XLOC_011141 | ENSSSCG00000021261 | 0.002372 |
| XLOC_011174 | CCDC63             | 0.002372 |
| XLOC_011178 | SH2B3              | 0.011350 |
| XLOC_011210 | OAS2               | 0.002372 |
| XLOC_011212 | OAS1               | 0.046618 |
| XLOC_011222 | U4                 | 0.024202 |
| XLOC_011249 | CMLKR1             | 0.002372 |

|             |                           |          |
|-------------|---------------------------|----------|
| XLOC_011269 | EMID1                     | 0.002372 |
| XLOC_011284 | ENSSSCG00000010011        | 0.008746 |
| XLOC_011321 | -                         | 0.035659 |
| XLOC_011328 | ADORA2A                   | 0.002372 |
| XLOC_011364 | GP1BB,SEPT5               | 0.017207 |
| XLOC_011373 | ENSSSCG00000026176        | 0.004177 |
| XLOC_011383 | -                         | 0.011350 |
| XLOC_011394 | -                         | 0.042609 |
| XLOC_011406 | TTC13                     | 0.002372 |
| XLOC_011428 | -                         | 0.005845 |
| XLOC_011452 | -                         | 0.002372 |
| XLOC_011460 | EIF4EBP2                  | 0.032252 |
| XLOC_011478 | PLAU                      | 0.002372 |
| XLOC_011492 | ENSSSCG00000010330        | 0.002372 |
| XLOC_011565 | STAMBPL1                  | 0.035659 |
| XLOC_011568 | IFIT3                     | 0.002372 |
| XLOC_011570 | IFIT5                     | 0.012580 |
| XLOC_011579 | HHEX                      | 0.002372 |
| XLOC_011580 | -                         | 0.007395 |
| XLOC_011589 | SLC35G1                   | 0.002372 |
| XLOC_011599 | ENSSSCG00000010498,ENTPD1 | 0.002372 |
| XLOC_011628 | SCD                       | 0.008746 |
| XLOC_011684 | TCF7L2                    | 0.002372 |
| XLOC_011710 | BAG3                      | 0.038749 |
| XLOC_011715 | ENSSSCG00000010692        | 0.017207 |
| XLOC_011724 | GMFG                      | 0.012580 |
| XLOC_011766 | -                         | 0.020320 |
| XLOC_011792 | NFIL3                     | 0.002372 |
| XLOC_011794 | SPTLC1                    | 0.008746 |
| XLOC_011796 | SLC18A1                   | 0.011350 |
| XLOC_011819 | ENTPD4                    | 0.015000 |
| XLOC_011851 | CTSB                      | 0.002372 |
| XLOC_011871 | PUS1                      | 0.040229 |
| XLOC_011916 | P2RX4                     | 0.002372 |
| XLOC_011917 | P2X7R                     | 0.027058 |
| XLOC_011918 | -                         | 0.015000 |
| XLOC_011924 | HVCN1                     | 0.008746 |
| XLOC_011962 | ALDH2                     | 0.020320 |
| XLOC_011978 | ENSSSCG00000009926        | 0.002372 |
| XLOC_011998 | -                         | 0.002372 |
| XLOC_012015 | OSM                       | 0.020320 |
| XLOC_012029 | PATZ1,PIK3IP1             | 0.049392 |
| XLOC_012090 | MTR                       | 0.002372 |

|             |                                           |          |
|-------------|-------------------------------------------|----------|
| XLOC_012096 | ENSSSCG00000010149,ENSSSC<br>G00000024830 | 0.002372 |
| XLOC_012103 | -                                         | 0.002372 |
| XLOC_012117 | ARV1                                      | 0.002372 |
| XLOC_012172 | -                                         | 0.002372 |
| XLOC_012180 | PRF1                                      | 0.002372 |
| XLOC_012186 | PSAP                                      | 0.018305 |
| XLOC_012193 | P4HA1                                     | 0.044005 |
| XLOC_012221 | TMEM254                                   | 0.002372 |
| XLOC_012271 | ALOX5                                     | 0.002372 |
| XLOC_012281 | SGMS1                                     | 0.002372 |
| XLOC_012285 | ANKRD22                                   | 0.002372 |
| XLOC_012288 | LIPA                                      | 0.002372 |
| XLOC_012292 | HTR7                                      | 0.002372 |
| XLOC_012295 | ENSSSCG00000010464                        | 0.002372 |
| XLOC_012301 | ENSSSCG00000010476                        | 0.023280 |
| XLOC_012324 | -                                         | 0.004177 |
| XLOC_012337 | SLC25A28                                  | 0.002372 |
| XLOC_012389 | -                                         | 0.021314 |
| XLOC_012397 | ABLIM1                                    | 0.002372 |
| XLOC_012442 | CHST15                                    | 0.002372 |
| XLOC_012503 | -                                         | 0.002372 |
| XLOC_012504 | -                                         | 0.042609 |
| XLOC_012513 | -                                         | 0.002372 |
| XLOC_012514 | -                                         | 0.002372 |
| XLOC_012515 | -                                         | 0.002372 |
| XLOC_012551 | -                                         | 0.033995 |
| XLOC_012565 | -                                         | 0.002372 |
| XLOC_012575 | -                                         | 0.002372 |
| XLOC_012605 | -                                         | 0.007395 |
| XLOC_012648 | -                                         | 0.002372 |
| XLOC_012750 | -                                         | 0.002372 |
| XLOC_012788 | -                                         | 0.002372 |
| XLOC_012828 | -                                         | 0.002372 |
| XLOC_012835 | -                                         | 0.002372 |
| XLOC_012885 | -                                         | 0.005845 |
| XLOC_012886 | -                                         | 0.002372 |
| XLOC_012888 | -                                         | 0.013835 |
| XLOC_012889 | -                                         | 0.004177 |
| XLOC_013058 | -                                         | 0.017207 |
| XLOC_013096 | -                                         | 0.002372 |
| XLOC_013110 | -                                         | 0.002372 |
| XLOC_013186 | -                                         | 0.002372 |
| XLOC_013206 | -                                         | 0.002372 |



|             |                                           |          |
|-------------|-------------------------------------------|----------|
| XLOC_013248 | CXCR4                                     | 0.002372 |
| XLOC_013276 | MARCO                                     | 0.002372 |
| XLOC_013277 | STEAP3                                    | 0.041076 |
| XLOC_013283 | BIN1                                      | 0.008746 |
| XLOC_013294 | ENSSSCG00000015738                        | 0.008746 |
| XLOC_013297 | PTPN4                                     | 0.004177 |
| XLOC_013301 | RALB                                      | 0.011350 |
| XLOC_013328 | WWC2                                      | 0.004177 |
| XLOC_013366 | GSR                                       | 0.037305 |
| XLOC_013378 | HS6ST1                                    | 0.018305 |
| XLOC_013394 | G3PD                                      | 0.002372 |
| XLOC_013400 | DAPL1                                     | 0.044653 |
| XLOC_013443 | CYBRD1                                    | 0.012580 |
| XLOC_013460 | -                                         | 0.002372 |
| XLOC_013517 | ENSSSCG00000027157                        | 0.002372 |
| XLOC_013518 | ENSSSCG00000016040                        | 0.002372 |
| XLOC_013547 | PLCL1                                     | 0.002372 |
| XLOC_013564 | C-FLIP                                    | 0.039463 |
| XLOC_013567 | ENSSSCG00000028157                        | 0.039463 |
| XLOC_013583 | FAM117B                                   | 0.002372 |
| XLOC_013587 | TP44                                      | 0.026101 |
| XLOC_013606 | PLEKHM3                                   | 0.002372 |
| XLOC_013637 | ENSSSCG00000016183                        | 0.034852 |
| XLOC_013641 | NRAMP1                                    | 0.002372 |
| XLOC_013670 | RAB11FIP5                                 | 0.016103 |
| XLOC_013693 | -                                         | 0.013835 |
| XLOC_013757 | TRAF3IP1                                  | 0.044005 |
| XLOC_013811 | -                                         | 0.005845 |
| XLOC_013823 | SPOPL                                     | 0.008746 |
| XLOC_013824 | HNMT                                      | 0.002372 |
| XLOC_013840 | SLC35F5                                   | 0.007395 |
| XLOC_013900 | FACL2                                     | 0.002372 |
| XLOC_013904 | UFSP2                                     | 0.037305 |
| XLOC_013916 | ADAM-9                                    | 0.019332 |
| XLOC_013933 | PROSC                                     | 0.048079 |
| XLOC_013942 | ENSSSCG00000025008,NRG1                   | 0.011350 |
| XLOC_013957 | PPP1R3B                                   | 0.011350 |
| XLOC_013976 | -                                         | 0.035659 |
| XLOC_013981 | ACVR1                                     | 0.044653 |
| XLOC_014020 | ENSSSCG00000022496,ENSSSC<br>G00000023421 | 0.010072 |
| XLOC_014077 | ENSSSCG00000026081                        | 0.002372 |
| XLOC_014081 | ENSSSCG00000027221                        | 0.002372 |

|             |                    |          |
|-------------|--------------------|----------|
| XLOC_014090 | STAT4              | 0.002372 |
| XLOC_014097 | GTF3C3             | 0.002372 |
| XLOC_014123 | ENSSSCG00000016106 | 0.004177 |
| XLOC_014160 | IDH1               | 0.002372 |
| XLOC_014166 | IKZF2              | 0.002372 |
| XLOC_014170 | FN1                | 0.002372 |
| XLOC_014172 | MREG               | 0.005845 |
| XLOC_014179 | ENSSSCG00000016184 | 0.002372 |
| XLOC_014217 | -                  | 0.021314 |
| XLOC_014237 | DNER               | 0.020320 |
| XLOC_014242 | GPR55              | 0.004177 |
| XLOC_014250 | ENSSSCG00000016277 | 0.040229 |
| XLOC_014263 | -                  | 0.004177 |
| XLOC_014271 | SCAR6              | 0.002372 |
| XLOC_014365 | -                  | 0.004177 |
| XLOC_014366 | -                  | 0.004177 |
| XLOC_014373 | -                  | 0.004177 |
| XLOC_014434 | -                  | 0.004177 |
| XLOC_014436 | -                  | 0.002372 |
| XLOC_014439 | -                  | 0.002372 |
| XLOC_014444 | -                  | 0.002372 |
| XLOC_014493 | -                  | 0.005845 |
| XLOC_014496 | -                  | 0.002372 |
| XLOC_014501 | -                  | 0.002372 |
| XLOC_014506 | -                  | 0.002372 |
| XLOC_014507 | -                  | 0.002372 |
| XLOC_014525 | -                  | 0.044005 |
| XLOC_014568 | -                  | 0.002372 |
| XLOC_014637 | -                  | 0.002372 |
| XLOC_014650 | -                  | 0.002372 |
| XLOC_014651 | -                  | 0.010072 |
| XLOC_014656 | -                  | 0.002372 |
| XLOC_014701 | -                  | 0.002372 |
| XLOC_014812 | -                  | 0.002372 |
| XLOC_014829 | -                  | 0.002372 |
| XLOC_014941 | -                  | 0.007395 |
| XLOC_014979 | -                  | 0.018305 |
| XLOC_015013 | ENSSSCG00000029792 | 0.011350 |
| XLOC_015015 | ENSSSCG00000016781 | 0.002372 |
| XLOC_015077 | EMB,SNORD28        | 0.027994 |
| XLOC_015088 | GZMA               | 0.004177 |
| XLOC_015102 | -                  | 0.007395 |
| XLOC_015103 | -                  | 0.045889 |
| XLOC_015127 | LY64               | 0.002372 |

|             |                    |          |
|-------------|--------------------|----------|
| XLOC_015150 | -                  | 0.045290 |
| XLOC_015154 | DUSP1              | 0.010072 |
| XLOC_015158 | SH3PXD2B           | 0.002372 |
| XLOC_015191 | -                  | 0.002372 |
| XLOC_015204 | ADAM19             | 0.002372 |
| XLOC_015222 | SLC36A1            | 0.002372 |
| XLOC_015249 | CH242-128B1.2      | 0.002372 |
| XLOC_015262 | ENSSSCG00000028803 | 0.012580 |
| XLOC_015263 | ENSSSCG00000025756 | 0.011350 |
| XLOC_015288 | -                  | 0.037305 |
| XLOC_015324 | DAB2               | 0.008746 |
| XLOC_015339 | -                  | 0.002372 |
| XLOC_015377 | PLK2               | 0.002372 |
| XLOC_015436 | -                  | 0.002372 |
| XLOC_015459 | TENM2              | 0.004177 |
| XLOC_015516 | GM2A               | 0.045889 |
| XLOC_015605 | -                  | 0.031419 |
| XLOC_015682 | -                  | 0.025115 |
| XLOC_015821 | -                  | 0.020320 |
| XLOC_015823 | -                  | 0.002372 |
| XLOC_015842 | -                  | 0.034852 |
| XLOC_015856 | -                  | 0.002372 |
| XLOC_015905 | -                  | 0.002372 |
| XLOC_015968 | -                  | 0.002372 |
| XLOC_016044 | CSGALCT1           | 0.019332 |
| XLOC_016047 | ADAM3A             | 0.024202 |
| XLOC_016050 | AGPAT6             | 0.002372 |
| XLOC_016059 | AP3M2              | 0.005845 |
| XLOC_016064 | -                  | 0.002372 |
| XLOC_016120 | ENSSSCG00000025340 | 0.025115 |
| XLOC_016145 | SIGLEC1            | 0.002372 |
| XLOC_016198 | ENSSSCG00000007239 | 0.002372 |
| XLOC_016199 | ENSSSCG00000007240 | 0.041848 |
| XLOC_016200 | -                  | 0.007395 |
| XLOC_016274 | PPP1R16B           | 0.004177 |
| XLOC_016302 | SLPI               | 0.002372 |
| XLOC_016314 | MMP9               | 0.008746 |
| XLOC_016343 | C/EBP,CEBPB        | 0.002372 |
| XLOC_016414 | MSR1               | 0.002372 |
| XLOC_016424 | ASAH1              | 0.002372 |
| XLOC_016434 | IDO1               | 0.004177 |
| XLOC_016459 | PRP                | 0.002372 |
| XLOC_016465 | GPCPD1             | 0.002372 |
| XLOC_016480 | JAG1               | 0.002372 |

|             |                                        |          |
|-------------|----------------------------------------|----------|
| XLOC_016492 | SNORD17                                | 0.004177 |
| XLOC_016513 | CST3                                   | 0.011350 |
| XLOC_016527 | CDC25B                                 | 0.049392 |
| XLOC_016531 | BC1                                    | 0.039463 |
| XLOC_016545 | -                                      | 0.007395 |
| XLOC_016546 | TGM3                                   | 0.007395 |
| XLOC_016573 | ENSSSCG00000007228                     | 0.036488 |
| XLOC_016645 | MAFB                                   | 0.002372 |
| XLOC_016660 | ADA                                    | 0.002372 |
| XLOC_016666 | ENSSSCG000000022258                    | 0.002372 |
| XLOC_016668 | SDC4                                   | 0.002372 |
| XLOC_016700 | SULF2                                  | 0.002372 |
| XLOC_016706 | DRK1                                   | 0.043224 |
| XLOC_016709 | B4GALT5                                | 0.002372 |
| XLOC_016717 | NFATC2                                 | 0.007395 |
| XLOC_016719 | ATP9A                                  | 0.027058 |
| XLOC_016743 | ZBP1                                   | 0.031419 |
| XLOC_016750 | CTSZ                                   | 0.045889 |
| XLOC_016817 | -                                      | 0.002372 |
| XLOC_016820 | -                                      | 0.002372 |
| XLOC_016824 | -                                      | 0.035659 |
| XLOC_016825 | -                                      | 0.013835 |
| XLOC_016839 | -                                      | 0.002372 |
| XLOC_016841 | -                                      | 0.004177 |
| XLOC_016842 | -                                      | 0.012580 |
| XLOC_016908 | -                                      | 0.004177 |
| XLOC_016989 | -                                      | 0.002372 |
| XLOC_017025 | -                                      | 0.045889 |
| XLOC_017026 | -                                      | 0.012580 |
| XLOC_017107 | -                                      | 0.002372 |
| XLOC_017139 | -                                      | 0.024202 |
| XLOC_017140 | -                                      | 0.015000 |
| XLOC_017187 | AOC1                                   | 0.022312 |
| XLOC_017212 | KIAA1147                               | 0.025115 |
| XLOC_017229 | SVOPL                                  | 0.042609 |
| XLOC_017233 | CREB3L2                                | 0.002372 |
| XLOC_017271 | KCP                                    | 0.035659 |
| XLOC_017304 | TSPAN12                                | 0.002372 |
| XLOC_017313 | TFEC                                   | 0.002372 |
| XLOC_017325 | ENSSSCG00000016648,ENSSSCG000000025602 | 0.002372 |
| XLOC_017352 | INMT                                   | 0.029810 |
| XLOC_017380 | CYCS                                   | 0.017207 |
| XLOC_017388 | TNS3                                   | 0.002372 |

|             |                                |          |
|-------------|--------------------------------|----------|
| XLOC_017393 | ENSSSCG00000016732,SNORA<br>5  | 0.002372 |
| XLOC_017416 | PSMA2                          | 0.004177 |
| XLOC_017459 | GALNTL5                        | 0.004177 |
| XLOC_017493 | EPHB6,TRBC1,TRBV21             | 0.019332 |
| XLOC_017499 | ENSSSCG00000029386             | 0.013835 |
| XLOC_017502 | -                              | 0.045290 |
| XLOC_017504 | SSBP1                          | 0.026101 |
| XLOC_017516 | TBXAS1                         | 0.002372 |
| XLOC_017518 | -                              | 0.028943 |
| XLOC_017583 | CALU                           | 0.002372 |
| XLOC_017585 | ENSSSCG00000016584,FAM71F<br>2 | 0.002372 |
| XLOC_017596 | GPR37                          | 0.002372 |
| XLOC_017619 | TES                            | 0.010072 |
| XLOC_017669 | CHN2                           | 0.045889 |
| XLOC_017680 | ENSSSCG00000023695             | 0.002372 |
| XLOC_017682 | SNX10                          | 0.013835 |
| XLOC_017702 | OGDH                           | 0.043224 |
| XLOC_017931 | -                              | 0.002372 |
| XLOC_018078 | -                              | 0.002372 |
| XLOC_018079 | -                              | 0.002372 |
| XLOC_018080 | -                              | 0.039463 |
| XLOC_018104 | -                              | 0.019332 |
| XLOC_018171 | -                              | 0.033995 |
| XLOC_018189 | -                              | 0.002372 |
| XLOC_018191 | -                              | 0.033125 |
| XLOC_018192 | -                              | 0.031419 |
| XLOC_018204 | -                              | 0.002372 |
| XLOC_018270 | TPCN2                          | 0.045889 |
| XLOC_018272 | CPT1A                          | 0.002372 |
| XLOC_018278 | ENSSSCG00000028501             | 0.002372 |
| XLOC_018279 | ENSSSCG00000012893             | 0.010072 |
| XLOC_018344 | BATF2                          | 0.002372 |
| XLOC_018346 | ATG2A                          | 0.012580 |
| XLOC_018379 | ENSSSCG00000022404             | 0.002372 |
| XLOC_018400 | FADS2                          | 0.002372 |
| XLOC_018432 | MPEG1                          | 0.002372 |
| XLOC_018498 | SPI1                           | 0.002372 |
| XLOC_018502 | ACP2                           | 0.004177 |
| XLOC_018514 | PHF21A                         | 0.007395 |
| XLOC_018565 | LGR4                           | 0.002372 |
| XLOC_018566 | CCDC34                         | 0.045290 |

|             |                                            |          |
|-------------|--------------------------------------------|----------|
| XLOC_018584 | ENSSSCG00000013353,ENSSSC<br>G00000025576  | 0.004177 |
| XLOC_018585 | ENSSSCG000000021688                        | 0.002372 |
| XLOC_018595 | LDHA                                       | 0.010072 |
| XLOC_018606 | PIK3C2A                                    | 0.002372 |
| XLOC_018610 | PLEKHA7                                    | 0.019332 |
| XLOC_018671 | -                                          | 0.002372 |
| XLOC_018691 | IFI30                                      | 0.002372 |
| XLOC_018699 | -                                          | 0.013835 |
| XLOC_018700 | SLC27A1                                    | 0.034852 |
| XLOC_018702 | ENSSSCG000000027848                        | 0.002372 |
| XLOC_018703 | ENSSSCG000000013880,ENSSSC<br>G00000026095 | 0.005845 |
| XLOC_018727 | ENSSSCG000000024211                        | 0.004177 |
| XLOC_018731 | EPHX3                                      | 0.010072 |
| XLOC_018757 | -                                          | 0.008746 |
| XLOC_018786 | JUNB                                       | 0.027994 |
| XLOC_018794 | MAN2B1                                     | 0.004177 |
| XLOC_018843 | C19orf38                                   | 0.018305 |
| XLOC_018866 | RETN                                       | 0.002372 |
| XLOC_018867 | -                                          | 0.002372 |
| XLOC_018880 | ADGRE1,ENSSSCG00000002222<br>8             | 0.002372 |
| XLOC_018888 | TNFSF9                                     | 0.002372 |
| XLOC_018928 | MFSD12                                     | 0.007395 |
| XLOC_018931 | G11                                        | 0.011350 |
| XLOC_018951 | DF,ELANE                                   | 0.004177 |
| XLOC_018954 | ARID3A                                     | 0.002372 |
| XLOC_018991 | RNF130                                     | 0.008746 |
| XLOC_018999 | ADAMTS2                                    | 0.002372 |
| XLOC_019017 | HK3                                        | 0.002372 |
| XLOC_019061 | ENSSSCG000000014121                        | 0.005845 |
| XLOC_019062 | FAM151B                                    | 0.002372 |
| XLOC_019073 | VCAN                                       | 0.008746 |
| XLOC_019114 | FER                                        | 0.022312 |
| XLOC_019122 | CAMK4,STARD4                               | 0.007395 |
| XLOC_019155 | SNX24                                      | 0.002372 |
| XLOC_019218 | TGFBI                                      | 0.015000 |
| XLOC_019232 | EGR1                                       | 0.002372 |
| XLOC_019235 | CTN1                                       | 0.002372 |
| XLOC_019238 | SNORA74                                    | 0.012580 |
| XLOC_019297 | ABLIM3                                     | 0.002372 |
| XLOC_019307 | PPARGC1B                                   | 0.011350 |
| XLOC_019365 | AP2A2                                      | 0.027994 |

|             |                                           |          |
|-------------|-------------------------------------------|----------|
| XLOC_019369 | ATGL                                      | 0.022312 |
| XLOC_019372 | TALDO1                                    | 0.046618 |
| XLOC_019400 | CPT1A                                     | 0.016103 |
| XLOC_019405 | TCIRG1                                    | 0.002372 |
| XLOC_019446 | CTSW                                      | 0.002372 |
| XLOC_019463 | CDC42EP2                                  | 0.002372 |
| XLOC_019465 | ENSSSCG00000012998                        | 0.002372 |
| XLOC_019480 | PLCB3                                     | 0.029810 |
| XLOC_019491 | -                                         | 0.002372 |
| XLOC_019503 | U2                                        | 0.007395 |
| XLOC_019524 | DAGLA                                     | 0.010072 |
| XLOC_019537 | CD5                                       | 0.013835 |
| XLOC_019538 | SLC15A3                                   | 0.002372 |
| XLOC_019543 | MS4A8B                                    | 0.048740 |
| XLOC_019570 | FAM111A                                   | 0.008746 |
| XLOC_019571 | FAM111B                                   | 0.002372 |
| XLOC_019585 | CTNND1                                    | 0.002372 |
| XLOC_019591 | C1-INH                                    | 0.004177 |
| XLOC_019641 | ENSSSCG00000013235,LXRA                   | 0.002372 |
| XLOC_019652 | -                                         | 0.038059 |
| XLOC_019690 | CD59                                      | 0.002372 |
| XLOC_019697 | PRRG4                                     | 0.002372 |
| XLOC_019727 | TMEM86A                                   | 0.004177 |
| XLOC_019737 | NUCB2                                     | 0.002372 |
| XLOC_019753 | -                                         | 0.002372 |
| XLOC_019765 | ADM                                       | 0.002372 |
| XLOC_019802 | -                                         | 0.002372 |
| XLOC_019803 | NLRP3                                     | 0.002372 |
| XLOC_019818 | MPV17L2                                   | 0.048740 |
| XLOC_019825 | B3GNT3                                    | 0.002372 |
| XLOC_019847 | ENSSSCG00000013842,ENSSSC<br>G00000027903 | 0.002372 |
| XLOC_019850 | RASAL3                                    | 0.004177 |
| XLOC_019880 | ENSSSCG00000027610                        | 0.002372 |
| XLOC_019882 | -                                         | 0.013835 |
| XLOC_019892 | CH242-184K22.3,IL27RA,RLN3                | 0.004177 |
| XLOC_019908 | DSE2                                      | 0.020320 |
| XLOC_019920 | ENSSSCG00000013716                        | 0.038059 |
| XLOC_019970 | RAB3D                                     | 0.002372 |
| XLOC_019971 | TMEM205                                   | 0.008746 |
| XLOC_020001 | MCOLN1,PNPLA6                             | 0.002372 |
| XLOC_020010 | -                                         | 0.002372 |

|             |                          |          |
|-------------|--------------------------|----------|
| XLOC_020045 | EBI3                     | 0.021314 |
| XLOC_020061 | NCLN                     | 0.012580 |
| XLOC_020071 | THOP1                    | 0.002372 |
| XLOC_020074 | SPPL2B                   | 0.008746 |
| XLOC_020109 | AZU1                     | 0.005845 |
| XLOC_020198 | -                        | 0.002372 |
| XLOC_020227 | KIAA0825                 | 0.027058 |
| XLOC_020237 | LIX1                     | 0.002372 |
| XLOC_020251 | ENSSSCG00000027074       | 0.027058 |
| XLOC_020271 | PGGT1B                   | 0.025115 |
| XLOC_020307 | IRF1                     | 0.002372 |
| XLOC_020317 | C5orf15                  | 0.027058 |
| XLOC_020320 | TCF7                     | 0.038059 |
| XLOC_020360 | -                        | 0.032252 |
| XLOC_020365 | HBEGF                    | 0.002372 |
| XLOC_020370 | CD14                     | 0.002372 |
| XLOC_020383 | ARAP3                    | 0.002372 |
| XLOC_020417 | -                        | 0.002372 |
| XLOC_020419 | CSF1R,ENSSSCG00000021886 | 0.035659 |
| XLOC_020514 | -                        | 0.002372 |
| XLOC_020520 | -                        | 0.002372 |
| XLOC_020551 | -                        | 0.007395 |
| XLOC_020574 | -                        | 0.026101 |
| XLOC_020637 | -                        | 0.023280 |
| XLOC_020670 | -                        | 0.002372 |
| XLOC_020688 | -                        | 0.033995 |
| XLOC_020739 | -                        | 0.032252 |
| XLOC_020808 | -                        | 0.002372 |
| XLOC_020809 | -                        | 0.008746 |
| XLOC_020810 | -                        | 0.012580 |
| XLOC_020813 | -                        | 0.038059 |
| XLOC_021002 | -                        | 0.016103 |
| XLOC_021079 | -                        | 0.025115 |
| XLOC_021126 | -                        | 0.002372 |
| XLOC_021134 | -                        | 0.008746 |
| XLOC_021137 | -                        | 0.007395 |
| XLOC_021138 | -                        | 0.011350 |
| XLOC_021140 | -                        | 0.002372 |
| XLOC_021147 | -                        | 0.037305 |
| XLOC_021200 | -                        | 0.002372 |
| XLOC_021251 | -                        | 0.016103 |
| XLOC_021280 | -                        | 0.029810 |
| XLOC_021403 | -                        | 0.012580 |
| XLOC_021412 | ENSSSCG00000007548       | 0.002372 |



|             |                               |          |
|-------------|-------------------------------|----------|
| XLOC_021418 | ENSSSCG00000007552            | 0.044653 |
| XLOC_021488 | SLC12A9                       | 0.002372 |
| XLOC_021497 | ENSSSCG000000023912           | 0.002372 |
| XLOC_021519 | LAT2                          | 0.021314 |
| XLOC_021524 | NCF1                          | 0.012580 |
| XLOC_021537 | GUSB                          | 0.002372 |
| XLOC_021550 | -                             | 0.002372 |
| XLOC_021554 | TRIM72                        | 0.002372 |
| XLOC_021562 | HSD3B7                        | 0.042609 |
| XLOC_021574 | -                             | 0.002372 |
| XLOC_021586 | SPNS1                         | 0.002372 |
| XLOC_021667 | ROGDI                         | 0.002372 |
| XLOC_021687 | MEFV                          | 0.002372 |
| XLOC_021693 | -                             | 0.017207 |
| XLOC_021737 | SLC9A3R2                      | 0.002372 |
| XLOC_021751 | ATP6V0C                       | 0.002372 |
| XLOC_021779 | ENSSSCG00000008087            | 0.002372 |
| XLOC_021783 | ENSSSCG000000022493           | 0.002372 |
| XLOC_021794 | MAL                           | 0.016103 |
| XLOC_021805 | ASTL,DUSP2                    | 0.002372 |
| XLOC_021823 | IL1R2                         | 0.002372 |
| XLOC_021824 | -                             | 0.002372 |
| XLOC_021829 | RNF149                        | 0.027994 |
| XLOC_021831 | TBC1D8                        | 0.002372 |
| XLOC_021845 | ENSSSCG000000030232,KIAA1211L | 0.002372 |
| XLOC_021859 | -                             | 0.010072 |
| XLOC_021868 | CD8B                          | 0.027994 |
| XLOC_021882 | NKL                           | 0.002372 |
| XLOC_021958 | -                             | 0.030613 |
| XLOC_021966 | RAB1B                         | 0.002372 |
| XLOC_022006 | CCDC88A                       | 0.002372 |
| XLOC_022009 | ENSSSCG00000008409,RTN4       | 0.045889 |
| XLOC_022057 | MAP4K3                        | 0.028943 |
| XLOC_022158 | ENSSSCG000000030115           | 0.043224 |
| XLOC_022172 | FAM49A                        | 0.002372 |
| XLOC_022195 | CMPK2                         | 0.027994 |
| XLOC_022241 | GRIFIN,LFNG                   | 0.002372 |
| XLOC_022242 | CHST12                        | 0.002372 |
| XLOC_022265 | ARPC1A                        | 0.031419 |
| XLOC_022301 | -                             | 0.007395 |
| XLOC_022337 | TPST1                         | 0.002372 |
| XLOC_022354 | -                             | 0.010072 |

|             |                    |          |
|-------------|--------------------|----------|
| XLOC_022357 | ENSSSCG00000007758 | 0.002372 |
| XLOC_022358 | ITGAM              | 0.016103 |
| XLOC_022373 | ZNF768             | 0.002372 |
| XLOC_022443 | ABCC1              | 0.032252 |
| XLOC_022452 | LITAF              | 0.007395 |
| XLOC_022504 | ZNF205             | 0.027058 |
| XLOC_022590 | IL1B               | 0.002372 |
| XLOC_022592 | IL1A               | 0.002372 |
| XLOC_022634 | FHL2               | 0.037305 |
| XLOC_022644 | IL1RL1             | 0.002372 |
| XLOC_022647 | IL1R2              | 0.002372 |
| XLOC_022648 | MAP4K4             | 0.024202 |
| XLOC_022660 | INPP4A             | 0.015000 |
| XLOC_022675 | RPIA               | 0.017207 |
| XLOC_022689 | CD8A               | 0.002372 |
| XLOC_022692 | REEP1              | 0.005845 |
| XLOC_022705 | CAPG               | 0.013835 |
| XLOC_022725 | HK2                | 0.002372 |
| XLOC_022761 | GK                 | 0.002372 |
| XLOC_022770 | MXD1               | 0.008746 |
| XLOC_022773 | ANXA4              | 0.002372 |
| XLOC_022786 | PLEK               | 0.002372 |
| XLOC_022792 | ENSSSCG00000027527 | 0.022312 |
| XLOC_022827 | -                  | 0.013835 |
| XLOC_022845 | MSH2               | 0.038059 |
| XLOC_022876 | ENSSSCG00000008476 | 0.037305 |
| XLOC_022893 | ENSSSCG00000008491 | 0.002372 |
| XLOC_022910 | -                  | 0.015000 |
| XLOC_022955 | SLC35F6            | 0.005845 |
| XLOC_022961 | RAB10              | 0.012580 |
| XLOC_022975 | RHOB               | 0.049392 |
| XLOC_022990 | -                  | 0.012580 |
| XLOC_022991 | ENSSSCG00000008624 | 0.023280 |
| XLOC_023061 | -                  | 0.047338 |
| XLOC_023161 | -                  | 0.004177 |
| XLOC_023293 | -                  | 0.002372 |
| XLOC_023300 | -                  | 0.002372 |
| XLOC_023319 | -                  | 0.002372 |
| XLOC_023320 | -                  | 0.043224 |
| XLOC_023321 | -                  | 0.036488 |
| XLOC_023416 | -                  | 0.042609 |
| XLOC_023419 | -                  | 0.040229 |
| XLOC_023433 | -                  | 0.002372 |
| XLOC_023437 | -                  | 0.012580 |

|             |                |          |
|-------------|----------------|----------|
| XLOC_023451 | -              | 0.002372 |
| XLOC_023453 | -              | 0.047338 |
| XLOC_023481 | -              | 0.002372 |
| XLOC_023500 | -              | 0.032252 |
| XLOC_023501 | -              | 0.002372 |
| XLOC_023509 | -              | 0.042609 |
| XLOC_023669 | -              | 0.002372 |
| XLOC_023674 | -              | 0.002372 |
| XLOC_023728 | -              | 0.045889 |
| XLOC_023729 | -              | 0.002372 |
| XLOC_023743 | -              | 0.004177 |
| XLOC_023851 | -              | 0.033995 |
| XLOC_023861 | -              | 0.008746 |
| XLOC_023980 | -              | 0.032252 |
| XLOC_023981 | -              | 0.026101 |
| XLOC_024017 | -              | 0.004177 |
| XLOC_024018 | -              | 0.002372 |
| XLOC_024041 | -              | 0.044005 |
| XLOC_024107 | SLC45A4        | 0.002372 |
| XLOC_024117 | ssc-mir-30d    | 0.012580 |
| XLOC_024170 | EXT1           | 0.004177 |
| XLOC_024186 | TMEM74         | 0.019332 |
| XLOC_024205 | NCALD          | 0.002372 |
| XLOC_024226 | STK3           | 0.018305 |
| XLOC_024227 | -              | 0.004177 |
| XLOC_024313 | SNORD87        | 0.002372 |
| XLOC_024327 | GGH            | 0.002372 |
| XLOC_024336 | TOX            | 0.011350 |
| XLOC_024350 | ATP6V1H        | 0.002372 |
| XLOC_024371 | SLC19A2        | 0.002372 |
| XLOC_024378 | MPC2           | 0.024202 |
| XLOC_024381 | CD3Z           | 0.002372 |
| XLOC_024416 | LY9            | 0.002372 |
| XLOC_024422 | PEX19          | 0.048079 |
| XLOC_024425 | SLAMF9         | 0.007395 |
| XLOC_024461 | FCRL3          | 0.005845 |
| XLOC_024482 | GLMP           | 0.002372 |
| XLOC_024501 | GBA            | 0.007395 |
| XLOC_024525 | SLC39A1        | 0.019332 |
| XLOC_024531 | S100A9         | 0.002372 |
| XLOC_024540 | S100A11        | 0.005845 |
| XLOC_024565 | ARNT,CTSK,CTSS | 0.008746 |
| XLOC_024593 | PRKAB2         | 0.002372 |
| XLOC_024605 | ZNF697         | 0.002372 |

|             |                          |          |
|-------------|--------------------------|----------|
| XLOC_024626 | TSPAN2                   | 0.002372 |
| XLOC_024639 | SLC16A1                  | 0.002372 |
| XLOC_024668 | PSMA5                    | 0.019332 |
| XLOC_024711 | F3                       | 0.002372 |
| XLOC_024720 | ENSSSCG00000006901       | 0.030613 |
| XLOC_024743 | GTF2B                    | 0.041848 |
| XLOC_024780 | GSDMD                    | 0.002372 |
| XLOC_024793 | ENSSSCG00000005941       | 0.020320 |
| XLOC_024810 | SQLE                     | 0.033125 |
| XLOC_024831 | DEPTOR                   | 0.012580 |
| XLOC_024838 | -                        | 0.005845 |
| XLOC_024842 | AARD                     | 0.002372 |
| XLOC_024874 | ATP6V1C1                 | 0.004177 |
| XLOC_024876 | KLF10                    | 0.004177 |
| XLOC_024898 | PGCP                     | 0.002372 |
| XLOC_024900 | SDC2                     | 0.002372 |
| XLOC_024954 | LY96                     | 0.015000 |
| XLOC_024974 | ADHFE1                   | 0.010072 |
| XLOC_024975 | RRS1                     | 0.038059 |
| XLOC_025004 | MRPL15                   | 0.031419 |
| XLOC_025018 | BLZF1                    | 0.033125 |
| XLOC_025019 | ATP1B1                   | 0.002372 |
| XLOC_025048 | UAP1                     | 0.036488 |
| XLOC_025050 | SH2D1B                   | 0.018305 |
| XLOC_025058 | CD32                     | 0.007395 |
| XLOC_025063 | FCER1G,NDUFS2            | 0.041076 |
| XLOC_025114 | PCD1B                    | 0.002372 |
| XLOC_025121 | -                        | 0.008746 |
| XLOC_025141 | LM                       | 0.002372 |
| XLOC_025144 | LAMTOR2                  | 0.002372 |
| XLOC_025161 | ENSSSCG00000006533       | 0.022312 |
| XLOC_025193 | S100A12                  | 0.002372 |
| XLOC_025194 | S100A8                   | 0.002372 |
| XLOC_025212 | PIP5K1A                  | 0.011350 |
| XLOC_025214 | TNFAIP8L2                | 0.002372 |
| XLOC_025222 | ADAMTSL4                 | 0.002372 |
| XLOC_025223 | ECM1                     | 0.002372 |
| XLOC_025263 | ENSSSCG00000030938,PHGDH | 0.002372 |
| XLOC_025281 | CD2                      | 0.002372 |
| XLOC_025283 | ATP1A1                   | 0.030613 |
| XLOC_025284 | MAB21L3,SLC22A15         | 0.008746 |
| XLOC_025294 | -                        | 0.042609 |
| XLOC_025343 | FAM102B                  | 0.024202 |
| XLOC_025344 | -                        | 0.002372 |

|             |                    |          |
|-------------|--------------------|----------|
| XLOC_025359 | VCAM1              | 0.046618 |
| XLOC_025368 | ENSSSCG00000006877 | 0.027058 |
| XLOC_025556 | -                  | 0.038749 |
| XLOC_025616 | -                  | 0.008746 |
| XLOC_025617 | -                  | 0.047338 |
| XLOC_025619 | -                  | 0.013835 |
| XLOC_025620 | -                  | 0.039463 |
| XLOC_025628 | -                  | 0.038749 |
| XLOC_025678 | -                  | 0.004177 |
| XLOC_025722 | -                  | 0.037305 |
| XLOC_025727 | -                  | 0.020320 |
| XLOC_025729 | -                  | 0.002372 |
| XLOC_025730 | -                  | 0.023280 |
| XLOC_025829 | -                  | 0.018305 |
| XLOC_025830 | -                  | 0.012580 |
| XLOC_025832 | -                  | 0.005845 |
| XLOC_025833 | -                  | 0.045290 |
| XLOC_025848 | -                  | 0.010072 |
| XLOC_025915 | -                  | 0.020320 |
| XLOC_025956 | -                  | 0.002372 |
| XLOC_025960 | -                  | 0.002372 |
| XLOC_025962 | -                  | 0.002372 |
| XLOC_025963 | -                  | 0.002372 |
| XLOC_026020 | -                  | 0.027994 |
| XLOC_026025 | -                  | 0.027994 |
| XLOC_026034 | -                  | 0.002372 |
| XLOC_026117 | -                  | 0.002372 |
| XLOC_026120 | -                  | 0.002372 |
| XLOC_026121 | -                  | 0.012580 |
| XLOC_026318 | ENSSSCG00000000018 | 0.013835 |
| XLOC_026339 | -                  | 0.019332 |
| XLOC_026351 | SLC25A17           | 0.002372 |
| XLOC_026397 | ENSSSCG00000029668 | 0.002372 |
| XLOC_026458 | -                  | 0.002372 |
| XLOC_026459 | ACVRL1             | 0.002372 |
| XLOC_026460 | ACVR1B             | 0.002372 |
| XLOC_026468 | CH242-185F9.2      | 0.002372 |
| XLOC_026477 | SPRYD3             | 0.022312 |
| XLOC_026576 | ENSSSCG00000000423 | 0.010072 |
| XLOC_026589 | SLC16A7            | 0.002372 |
| XLOC_026616 | IFN-GAMMA          | 0.018305 |
| XLOC_026652 | FGD4               | 0.002372 |
| XLOC_026682 | -                  | 0.027058 |
| XLOC_026710 | -                  | 0.020320 |

|             |                    |          |
|-------------|--------------------|----------|
| XLOC_026712 | ENSSSCG00000030611 | 0.004177 |
| XLOC_026717 | LRP6               | 0.002372 |
| XLOC_026727 | ENSSSCG00000000640 | 0.002372 |
| XLOC_026728 | KLRK1              | 0.002372 |
| XLOC_026737 | CLEC2B             | 0.002372 |
| XLOC_026738 | CD69               | 0.016103 |
| XLOC_026739 | CLECL1             | 0.016103 |
| XLOC_026741 | KLRB1              | 0.002372 |
| XLOC_026744 | A2M                | 0.016103 |
| XLOC_026746 | KLRG1              | 0.002372 |
| XLOC_026750 | SLC2A3             | 0.002372 |
| XLOC_026753 | ENSSSCG00000026009 | 0.002372 |
| XLOC_026767 | TNFRSF1A           | 0.007395 |
| XLOC_026803 | USP18              | 0.011350 |
| XLOC_026848 | TXNRD1             | 0.002372 |
| XLOC_026893 | LTA4H              | 0.005845 |
| XLOC_026903 | PLXNC1             | 0.031419 |
| XLOC_026921 | ATP2B1             | 0.008746 |
| XLOC_026945 | DYRK2              | 0.017207 |
| XLOC_026981 | TSPO               | 0.017207 |
| XLOC_026991 | -                  | 0.002372 |
| XLOC_027021 | MAFF               | 0.005845 |
| XLOC_027026 | ENSSSCG00000025720 | 0.031419 |
| XLOC_027037 | CYTH4              | 0.021314 |
| XLOC_027040 | CSF2RB             | 0.002372 |
| XLOC_027041 | NCF4               | 0.004177 |
| XLOC_027073 | -                  | 0.002372 |
| XLOC_027113 | ENSSSCG00000000246 | 0.002372 |
| XLOC_027126 | RARG               | 0.004177 |
| XLOC_027144 | NFE2               | 0.028943 |
| XLOC_027145 | ENSSSCG00000000291 | 0.002372 |
| XLOC_027146 | ZNF385A            | 0.017207 |
| XLOC_027179 | CD63               | 0.004177 |
| XLOC_027181 | MMP19              | 0.002372 |
| XLOC_027204 | APON,TIMELESS      | 0.024202 |
| XLOC_027222 | ENSSSCG00000023150 | 0.045290 |
| XLOC_027224 | ENSSSCG00000023150 | 0.002372 |
| XLOC_027240 | LRIG3              | 0.005845 |
| XLOC_027246 | ENSSSCG00000023715 | 0.002372 |
| XLOC_027256 | -                  | 0.011350 |
| XLOC_027268 | LYZ                | 0.002372 |
| XLOC_027310 | STK38L             | 0.002372 |
| XLOC_027326 | GOLT1B             | 0.002372 |
| XLOC_027344 | ENSSSCG00000000600 | 0.002372 |

|             |                          |          |
|-------------|--------------------------|----------|
| XLOC_027350 | PLBD1                    | 0.002372 |
| XLOC_027353 | HEBP1                    | 0.002372 |
| XLOC_027356 | BCL2L14                  | 0.029810 |
| XLOC_027362 | -                        | 0.027058 |
| XLOC_027378 | ENSSSCG000000025680      | 0.002372 |
| XLOC_027404 | LTBR                     | 0.004177 |
| XLOC_027416 | TIGAR                    | 0.032252 |
| XLOC_027427 | ENSSSCG00000000744,FKBP4 | 0.012580 |
| XLOC_027505 | DRAM1                    | 0.002372 |
| XLOC_027506 | CHPT1                    | 0.002372 |
| XLOC_027554 | ENSSSCG000000000921      | 0.002372 |
| XLOC_027568 | ACSS3                    | 0.002372 |
| XLOC_027606 | -                        | 0.023280 |
| XLOC_027611 | -                        | 0.044653 |
| XLOC_027653 | -                        | 0.048079 |
| XLOC_027682 | -                        | 0.049392 |
| XLOC_027690 | -                        | 0.017207 |
| XLOC_027928 | -                        | 0.002372 |
| XLOC_027930 | -                        | 0.002372 |
| XLOC_027936 | -                        | 0.002372 |
| XLOC_027944 | -                        | 0.010072 |
| XLOC_027962 | -                        | 0.028943 |
| XLOC_027964 | -                        | 0.002372 |
| XLOC_027968 | -                        | 0.002372 |
| XLOC_028092 | -                        | 0.016103 |
| XLOC_028159 | -                        | 0.016103 |
| XLOC_028284 | -                        | 0.002372 |
| XLOC_028321 | ADGRG5                   | 0.005845 |
| XLOC_028322 | GPR56                    | 0.002372 |
| XLOC_028323 | ADGRG3                   | 0.002372 |
| XLOC_028353 | NFATC3                   | 0.038059 |
| XLOC_028380 | ENSSSCG000000026318      | 0.002372 |
| XLOC_028433 | ZBTB32                   | 0.016103 |
| XLOC_028464 | SPINT2                   | 0.002372 |
| XLOC_028496 | ITPKC                    | 0.022312 |
| XLOC_028538 | ENSSSCG000000003064      | 0.041848 |
| XLOC_028575 | C5AR1                    | 0.002372 |
| XLOC_028576 | C5AR2,DHX34              | 0.002372 |
| XLOC_028603 | PPP1R15A                 | 0.002372 |
| XLOC_028622 | ADM5,CPT1C               | 0.033995 |
| XLOC_028625 | AP2A1                    | 0.002372 |
| XLOC_028630 | ENSSSCG000000003202      | 0.002372 |
| XLOC_028645 | ENSSSCG000000003226      | 0.002372 |
| XLOC_028680 | -                        | 0.008746 |

|             |                              |          |
|-------------|------------------------------|----------|
| XLOC_028688 | -                            | 0.002372 |
| XLOC_028698 | ENSSSCG00000029500           | 0.004177 |
| XLOC_028820 | PGD                          | 0.002372 |
| XLOC_028835 | PLOD1                        | 0.002372 |
| XLOC_028839 | -                            | 0.002372 |
| XLOC_028854 | TMEM51                       | 0.011350 |
| XLOC_028868 | PADI4                        | 0.002372 |
| XLOC_028870 | ENSSSCG00000022946           | 0.013835 |
| XLOC_028885 | CDA                          | 0.002372 |
| XLOC_028898 | C1QA                         | 0.002372 |
| XLOC_028899 | C1QC                         | 0.002372 |
| XLOC_028900 | C1QB                         | 0.040229 |
| XLOC_028907 | CNR2,FUCA1                   | 0.025115 |
| XLOC_028913 | RCAN3                        | 0.048079 |
| XLOC_028932 | HMG2                         | 0.027994 |
| XLOC_028950 | STX12                        | 0.024202 |
| XLOC_028953 | THEMIS2                      | 0.043224 |
| XLOC_028954 | SMPDL3B                      | 0.033125 |
| XLOC_028972 | SDC3                         | 0.002372 |
| XLOC_029015 | UTP11L                       | 0.002372 |
| XLOC_029041 | RAB31                        | 0.019332 |
| XLOC_029093 | TTR                          | 0.002372 |
| XLOC_029117 | MCOLN2                       | 0.042609 |
| XLOC_029120 | PRKACG                       | 0.039463 |
| XLOC_029148 | GPR177                       | 0.002372 |
| XLOC_029154 | PDE4B                        | 0.004177 |
| XLOC_029179 | DHCR24                       | 0.012580 |
| XLOC_029199 | ZFYVE9                       | 0.011350 |
| XLOC_029276 | P3H1                         | 0.048079 |
| XLOC_029292 | VPS9D1,ZNF276                | 0.004177 |
| XLOC_029322 | KIAA0513                     | 0.002372 |
| XLOC_029354 | MLKL                         | 0.008746 |
| XLOC_029359 | ENSSSCG0000002723,EXOSC<br>6 | 0.038749 |
| XLOC_029377 | ENSSSCG0000002743            | 0.034852 |
| XLOC_029400 | CCDC102A                     | 0.005845 |
| XLOC_029426 | ATP6V0D1                     | 0.005845 |
| XLOC_029437 | DUS2                         | 0.004177 |
| XLOC_029447 | MMP2                         | 0.008746 |
| XLOC_029453 | ENSSSCG0000002843            | 0.018305 |
| XLOC_029472 | C/EBP                        | 0.002372 |
| XLOC_029478 | GPI                          | 0.005845 |
| XLOC_029484 | FFAR2                        | 0.002372 |
| XLOC_029498 | NFKBID                       | 0.026101 |



|             |                                |          |
|-------------|--------------------------------|----------|
| XLOC_029499 | TYROBP                         | 0.002372 |
| XLOC_029525 | RASGRP4                        | 0.005845 |
| XLOC_029565 | PLD3                           | 0.004177 |
| XLOC_029570 | AXL                            | 0.002372 |
| XLOC_029592 | ETHE1                          | 0.002372 |
| XLOC_029597 | PLAUR                          | 0.002372 |
| XLOC_029610 | PVR                            | 0.022312 |
| XLOC_029617 | PGLYRP                         | 0.004177 |
| XLOC_029619 | PTGIR                          | 0.002372 |
| XLOC_029622 | PRKD2                          | 0.019332 |
| XLOC_029625 | AP2S1                          | 0.007395 |
| XLOC_029708 | ENSSSCG00000024518,SIGLEC<br>5 | 0.002372 |
| XLOC_029722 | NLRP12                         | 0.002372 |
| XLOC_029727 | TARM1                          | 0.002372 |
| XLOC_029728 | OSCAR                          | 0.030613 |
| XLOC_029732 | MBOAT7                         | 0.007395 |
| XLOC_029734 | ENSSSCG00000003272             | 0.002372 |
| XLOC_029735 | ENSSSCG00000025549             | 0.030613 |
| XLOC_029898 | PADI2                          | 0.002372 |
| XLOC_029900 | ARHGEF10L                      | 0.002372 |
| XLOC_029906 | AKR7A2                         | 0.004177 |
| XLOC_029922 | ECE1                           | 0.002372 |
| XLOC_029937 | TCEB3                          | 0.010072 |
| XLOC_029943 | RUNX3                          | 0.002372 |
| XLOC_029944 | -                              | 0.002372 |
| XLOC_029965 | FGR                            | 0.002372 |
| XLOC_030013 | RNF19B                         | 0.002372 |
| XLOC_030014 | AZIN2                          | 0.008746 |
| XLOC_030019 | ENSSSCG00000003626             | 0.002372 |
| XLOC_030054 | MYCL                           | 0.002372 |
| XLOC_030071 | -                              | 0.042609 |
| XLOC_030080 | EPB41L3                        | 0.002372 |
| XLOC_030085 | EMILIN2                        | 0.031419 |
| XLOC_030087 | ENSSSCG00000027264             | 0.039463 |
| XLOC_030107 | NPC1                           | 0.002372 |
| XLOC_030143 | ENSSSCG00000025209             | 0.005845 |
| XLOC_030148 | PRKACB                         | 0.024202 |
| XLOC_030151 | ADGRL2                         | 0.002372 |
| XLOC_030153 | IFI44                          | 0.002372 |
| XLOC_030167 | ACADM                          | 0.036488 |
| XLOC_030181 | SLC35D1                        | 0.030613 |
| XLOC_030183 | ENSSSCG00000030423             | 0.002372 |
| XLOC_030233 | ZYG11A                         | 0.015000 |

|             |             |          |
|-------------|-------------|----------|
| XLOC_030245 | SPATA6      | 0.048079 |
| XLOC_030375 | -           | 0.005845 |
| XLOC_030563 | -           | 0.026101 |
| XLOC_030600 | -           | 0.002372 |
| XLOC_030709 | -           | 0.046618 |
| XLOC_030739 | -           | 0.002372 |
| XLOC_030752 | -           | 0.002372 |
| XLOC_030806 | -           | 0.004177 |
| XLOC_030866 | -           | 0.017207 |
| XLOC_030951 | -           | 0.026101 |
| XLOC_030952 | -           | 0.023280 |
| XLOC_030962 | -           | 0.021314 |
| XLOC_030980 | -           | 0.017207 |
| XLOC_030982 | -           | 0.002372 |
| XLOC_031021 | -           | 0.039463 |
| XLOC_031046 | -           | 0.002372 |
| XLOC_031081 | -           | 0.008746 |
| XLOC_031145 | -           | 0.002372 |
| XLOC_031146 | -           | 0.002372 |
| XLOC_031235 | -           | 0.028943 |
| XLOC_031345 | -           | 0.007395 |
| XLOC_031394 | -           | 0.038749 |
| XLOC_031415 | -           | 0.023280 |
| XLOC_031468 | EDN1        | 0.002372 |
| XLOC_031469 | -           | 0.022312 |
| XLOC_031472 | CD83        | 0.004177 |
| XLOC_031493 | SOX4        | 0.004177 |
| XLOC_031559 | Metazoa_SRP | 0.005845 |
| XLOC_031575 | UBD         | 0.002372 |
| XLOC_031627 | LTB         | 0.007395 |
| XLOC_031632 | SLA-6       | 0.032252 |
| XLOC_031680 | ANKS1A      | 0.002372 |
| XLOC_031726 | -           | 0.017207 |
| XLOC_031758 | SLC29A1     | 0.019332 |
| XLOC_031804 | FAH         | 0.002372 |
| XLOC_031806 | ABHD17C     | 0.002372 |
| XLOC_031808 | MESDC2      | 0.005845 |
| XLOC_031831 | FURIN       | 0.028943 |
| XLOC_031832 | FES         | 0.005845 |
| XLOC_031854 | ZNF710      | 0.017207 |
| XLOC_031876 | SCAMP2      | 0.020320 |
| XLOC_031881 | -           | 0.004177 |
| XLOC_031889 | HEXA        | 0.002372 |
| XLOC_031892 | PKM         | 0.005845 |

|             |                                 |          |
|-------------|---------------------------------|----------|
| XLOC_031904 | NFKBIA                          | 0.002372 |
| XLOC_031914 | EAPP                            | 0.046618 |
| XLOC_031917 | U6                              | 0.045889 |
| XLOC_031924 | HEATR5A                         | 0.028943 |
| XLOC_031933 | GZMH                            | 0.007395 |
| XLOC_031949 | JPH4                            | 0.018305 |
| XLOC_031960 | CEBPE                           | 0.022312 |
| XLOC_031963 | ENSSSCG00000002036              | 0.020320 |
| XLOC_032047 | ENSSSCG000000022551             | 0.027058 |
| XLOC_032057 | HSPA2                           | 0.015000 |
| XLOC_032089 | SIPA1L1                         | 0.048740 |
| XLOC_032093 | PSEN1                           | 0.002372 |
| XLOC_032113 | FOS                             | 0.002372 |
| XLOC_032122 | VASH1                           | 0.008746 |
| XLOC_032151 | GPR65                           | 0.040229 |
| XLOC_032159 | KCNK13                          | 0.002372 |
| XLOC_032164 | SLC24A4                         | 0.023280 |
| XLOC_032271 | SERPINB1                        | 0.002372 |
| XLOC_032284 | -                               | 0.018305 |
| XLOC_032314 | ENSSSCG000000020858             | 0.002372 |
| XLOC_032321 | MBOAT1                          | 0.002372 |
| XLOC_032449 | IER3                            | 0.002372 |
| XLOC_032452 | SUSC-MIC2                       | 0.021314 |
| XLOC_032460 | AIF1                            | 0.002372 |
| XLOC_032462 | LST1                            | 0.002372 |
| XLOC_032464 | TNFA                            | 0.002372 |
| XLOC_032474 | BF,C2                           | 0.005845 |
| XLOC_032561 | FKBP5                           | 0.019332 |
| XLOC_032596 | TREM-1                          | 0.011350 |
| XLOC_032632 | NFKBIE                          | 0.002372 |
| XLOC_032647 | TNFRSF21                        | 0.002372 |
| XLOC_032682 | CTSH                            | 0.008746 |
| XLOC_032687 | BCL2A1                          | 0.002372 |
| XLOC_032732 | C7H15orf38                      | 0.002372 |
| XLOC_032758 | SCAMP5                          | 0.005845 |
| XLOC_032787 | -                               | 0.002372 |
| XLOC_032809 | GZMB,GZMH                       | 0.007395 |
| XLOC_032812 | ENSSSCG000000028443,SNORA<br>11 | 0.015000 |
| XLOC_032831 | HOMEZ                           | 0.022312 |
| XLOC_032842 | MMP14                           | 0.019332 |
| XLOC_032851 | TRDC                            | 0.002372 |
| XLOC_032857 | TRADV8                          | 0.002372 |
| XLOC_032874 | ENSSSCG00000002084              | 0.038059 |

|             |                     |          |
|-------------|---------------------|----------|
| XLOC_032890 | -                   | 0.016103 |
| XLOC_032937 | ARRDC4              | 0.002372 |
| XLOC_032940 | -                   | 0.002372 |
| XLOC_032943 | SLCO3A1             | 0.004177 |
| XLOC_032950 | SPTB                | 0.002372 |
| XLOC_032958 | ATP6V1D             | 0.002372 |
| XLOC_032965 | ZFP36L1             | 0.002372 |
| XLOC_032985 | ENSSSCG000000022178 | 0.002372 |
| XLOC_032998 | NPC2                | 0.024202 |
| XLOC_033008 | -                   | 0.002372 |
| XLOC_033027 | GTF2A1              | 0.023280 |
| XLOC_033030 | -                   | 0.038749 |
| XLOC_033033 | GALC                | 0.002372 |
| XLOC_033052 | TC2N                | 0.016103 |
| XLOC_033055 | ATXN3               | 0.025115 |
| XLOC_033059 | ENSSSCG00000002452  | 0.002372 |
| XLOC_033087 | BCL11B              | 0.002372 |
| XLOC_033238 | -                   | 0.002372 |
| XLOC_033240 | -                   | 0.002372 |
| XLOC_033241 | -                   | 0.002372 |
| XLOC_033243 | -                   | 0.002372 |
| XLOC_033244 | -                   | 0.002372 |
| XLOC_033245 | -                   | 0.022312 |
| XLOC_033246 | -                   | 0.002372 |
| XLOC_033250 | -                   | 0.002372 |
| XLOC_033257 | -                   | 0.035659 |
| XLOC_033275 | -                   | 0.002372 |
| XLOC_033277 | -                   | 0.002372 |
| XLOC_033359 | -                   | 0.002372 |
| XLOC_033496 | -                   | 0.044005 |
| XLOC_033542 | -                   | 0.002372 |
| XLOC_033543 | -                   | 0.002372 |
| XLOC_033544 | -                   | 0.007395 |
| XLOC_033562 | -                   | 0.002372 |
| XLOC_033657 | -                   | 0.002372 |
| XLOC_033658 | -                   | 0.019332 |
| XLOC_033661 | -                   | 0.002372 |
| XLOC_033715 | -                   | 0.002372 |
| XLOC_033718 | -                   | 0.002372 |
| XLOC_033719 | -                   | 0.002372 |
| XLOC_033857 | -                   | 0.002372 |
| XLOC_033978 | -                   | 0.002372 |
| XLOC_034000 | -                   | 0.025115 |
| XLOC_034058 | SH3BP2              | 0.007395 |

|             |                          |          |
|-------------|--------------------------|----------|
| XLOC_034064 | LREAP1                   | 0.002372 |
| XLOC_034070 | JAKMIP1                  | 0.010072 |
| XLOC_034114 | RBPJ                     | 0.011350 |
| XLOC_034124 | ENSSSCG00000008769       | 0.002372 |
| XLOC_034151 | -                        | 0.002372 |
| XLOC_034206 | TMEM144                  | 0.002372 |
| XLOC_034226 | HOPX                     | 0.002372 |
| XLOC_034259 | UTP3                     | 0.048740 |
| XLOC_034262 | DCK                      | 0.038749 |
| XLOC_034263 | SLC4A4                   | 0.002372 |
| XLOC_034272 | CXCL8                    | 0.002372 |
| XLOC_034276 | CXCL2,ENSSSCG00000008954 | 0.002372 |
| XLOC_034278 | EREG                     | 0.023280 |
| XLOC_034279 | AREG                     | 0.002372 |
| XLOC_034285 | -                        | 0.002372 |
| XLOC_034293 | U1                       | 0.021314 |
| XLOC_034302 | CCNG2                    | 0.002372 |
| XLOC_034351 | ELMOD2                   | 0.018305 |
| XLOC_034353 | CLGN                     | 0.010072 |
| XLOC_034376 | TRPC3                    | 0.002372 |
| XLOC_034380 | ANXA5                    | 0.002372 |
| XLOC_034407 | ALPK1                    | 0.032252 |
| XLOC_034419 | LEF1                     | 0.043224 |
| XLOC_034474 | FAM13A                   | 0.002372 |
| XLOC_034481 | HSD17B11                 | 0.002372 |
| XLOC_034522 | MFSD7                    | 0.002372 |
| XLOC_034578 | TAPT1                    | 0.018305 |
| XLOC_034584 | ENSSSCG00000023604       | 0.028943 |
| XLOC_034585 | -                        | 0.027058 |
| XLOC_034608 | ARAP2                    | 0.019332 |
| XLOC_034612 | TLR1,TLR6                | 0.005845 |
| XLOC_034624 | RBM47                    | 0.002372 |
| XLOC_034631 | ENSSSCG00000008803       | 0.034852 |
| XLOC_034688 | RAPGEF2                  | 0.008746 |
| XLOC_034746 | JCHAIN                   | 0.002372 |
| XLOC_034748 | -                        | 0.018305 |
| XLOC_034758 | ALB                      | 0.002372 |
| XLOC_034770 | AA                       | 0.002372 |
| XLOC_034776 | SCARB2                   | 0.004177 |
| XLOC_034783 | -                        | 0.025115 |
| XLOC_034795 | TLR2                     | 0.002372 |
| XLOC_034834 | -                        | 0.002372 |
| XLOC_034836 | -                        | 0.032252 |
| XLOC_034837 | ENSSSCG00000009057       | 0.002372 |

|             |                     |          |
|-------------|---------------------|----------|
| XLOC_034895 | CCDC109B            | 0.002372 |
| XLOC_034902 | OSTC                | 0.010072 |
| XLOC_034922 | -                   | 0.008746 |
| XLOC_034923 | SLC39A8             | 0.002372 |
| XLOC_034953 | ENSSSCG000000030548 | 0.002372 |
| XLOC_034964 | ENSSSCG000000009226 | 0.004177 |
| XLOC_034968 | PTPN13              | 0.002372 |
| XLOC_034972 | CDS1                | 0.002372 |
| XLOC_034973 | AGPAT9              | 0.002372 |
| XLOC_035146 | -                   | 0.002372 |
| XLOC_035313 | -                   | 0.034852 |
| XLOC_035431 | -                   | 0.017207 |
| XLOC_035442 | -                   | 0.037305 |
| XLOC_035460 | -                   | 0.004177 |
| XLOC_035461 | -                   | 0.002372 |
| XLOC_035463 | -                   | 0.002372 |
| XLOC_035555 | -                   | 0.030613 |
| XLOC_035556 | -                   | 0.005845 |
| XLOC_035594 | -                   | 0.008746 |
| XLOC_035697 | -                   | 0.002372 |
| XLOC_035708 | DENND5A             | 0.038749 |
| XLOC_035741 | TPP1                | 0.045889 |
| XLOC_035748 | FAM160A2            | 0.015000 |
| XLOC_035820 | FOLR1               | 0.002372 |
| XLOC_035875 | PRCP                | 0.016103 |
| XLOC_035885 | -                   | 0.002372 |
| XLOC_035926 | C11orf54            | 0.002372 |
| XLOC_035970 | RAB39A              | 0.002372 |
| XLOC_035981 | ZC3H12C             | 0.002372 |
| XLOC_036011 | CADM1               | 0.004177 |
| XLOC_036025 | IL10RA              | 0.002372 |
| XLOC_036027 | CD3E                | 0.002372 |
| XLOC_036041 | C2CD2L              | 0.002372 |
| XLOC_036050 | OAF                 | 0.002372 |
| XLOC_036057 | SC5D                | 0.005845 |
| XLOC_036082 | VWA5A               | 0.002372 |
| XLOC_036120 | ETS1                | 0.025115 |
| XLOC_036152 | BTG2                | 0.002372 |
| XLOC_036164 | TMCC2               | 0.002372 |
| XLOC_036169 | RAB7B               | 0.002372 |
| XLOC_036170 | -                   | 0.002372 |
| XLOC_036171 | C1orf186            | 0.002372 |
| XLOC_036179 | -                   | 0.020320 |

|             |                          |          |
|-------------|--------------------------|----------|
| XLOC_036189 | C4BPA,ENSSSCG00000015663 | 0.002372 |
| XLOC_036194 | ENSSSCG00000015294       | 0.022312 |
| XLOC_036205 | CDK14                    | 0.018305 |
| XLOC_036208 | GATAD1                   | 0.011350 |
| XLOC_036228 | ENSSSCG00000015335       | 0.002372 |
| XLOC_036248 | ARL4A                    | 0.002372 |
| XLOC_036253 | -                        | 0.002372 |
| XLOC_036262 | ITGB8                    | 0.017207 |
| XLOC_036265 | SP4                      | 0.019332 |
| XLOC_036272 | IGF2BP3                  | 0.029810 |
| XLOC_036293 | HGF                      | 0.002372 |
| XLOC_036296 | GT3                      | 0.033125 |
| XLOC_036316 | -                        | 0.005845 |
| XLOC_036375 | ENSSSCG00000015499       | 0.007395 |
| XLOC_036382 | ENSSSCG00000023839       | 0.015000 |
| XLOC_036432 | PLA2G4A                  | 0.002372 |
| XLOC_036443 | ATF3                     | 0.002372 |
| XLOC_036457 | G0S2                     | 0.002372 |
| XLOC_036528 | PRKCDBP                  | 0.005845 |
| XLOC_036607 | OR51E1                   | 0.002372 |
| XLOC_036641 | ARAP1                    | 0.043224 |
| XLOC_036683 | PAK1                     | 0.008746 |
| XLOC_036694 | GAB2                     | 0.002372 |
| XLOC_036707 | SYTL2                    | 0.002372 |
| XLOC_036711 | PICALM                   | 0.022312 |
| XLOC_036717 | FZD4                     | 0.002372 |
| XLOC_036755 | -                        | 0.038059 |
| XLOC_036759 | MMP8                     | 0.007395 |
| XLOC_036773 | CASP1,ENSSSCG00000014997 | 0.002372 |
| XLOC_036790 | RDX                      | 0.041848 |
| XLOC_036925 | ARHGAP32                 | 0.002372 |
| XLOC_036948 | SOX13                    | 0.015000 |
| XLOC_036960 | NUAK2                    | 0.012580 |
| XLOC_036966 | SLC45A3                  | 0.002372 |
| XLOC_036979 | IL10                     | 0.002372 |
| XLOC_036980 | -                        | 0.025115 |
| XLOC_037017 | TFPI2                    | 0.002372 |
| XLOC_037026 | PON2                     | 0.013835 |
| XLOC_037040 | ETV1                     | 0.002372 |
| XLOC_037047 | ENSSSCG00000029648       | 0.048079 |
| XLOC_037051 | TSPAN13                  | 0.002372 |
| XLOC_037093 | ENSSSCG00000025166       | 0.041076 |
| XLOC_037121 | -                        | 0.043224 |

|             |                                                                         |          |
|-------------|-------------------------------------------------------------------------|----------|
| XLOC_037122 | ENSSSCG00000023584,ENSSSC<br>G00000026913,ENSSSCG000000<br>29596,TRGV11 | 0.038749 |
| XLOC_037149 | CHI3L1                                                                  | 0.002372 |
| XLOC_037150 | CHIT1                                                                   | 0.015000 |
| XLOC_037156 | FASLG                                                                   | 0.016103 |
| XLOC_037172 | RFWD2                                                                   | 0.010072 |
| XLOC_037196 | XPR1                                                                    | 0.002372 |
| XLOC_037205 | GLUL                                                                    | 0.004177 |
| XLOC_037214 | NCF2                                                                    | 0.002372 |
| XLOC_037226 | PTGS2                                                                   | 0.002372 |
| XLOC_037229 | CENPF                                                                   | 0.041848 |
| XLOC_037235 | FLVCR1                                                                  | 0.045290 |
| XLOC_037259 | -                                                                       | 0.044005 |
| XLOC_037274 | SEC61G                                                                  | 0.012580 |
| XLOC_037293 | -                                                                       | 0.002372 |
| XLOC_037330 | -                                                                       | 0.044005 |
| XLOC_037350 | -                                                                       | 0.013835 |
| XLOC_037438 | -                                                                       | 0.015000 |
| XLOC_037456 | -                                                                       | 0.002372 |
| XLOC_037564 | -                                                                       | 0.023280 |
| XLOC_037590 | -                                                                       | 0.002372 |
| XLOC_037591 | -                                                                       | 0.002372 |
| XLOC_037597 | -                                                                       | 0.008746 |
| XLOC_037604 | -                                                                       | 0.032252 |
| XLOC_037626 | -                                                                       | 0.026101 |
| XLOC_037634 | -                                                                       | 0.002372 |
| XLOC_037636 | -                                                                       | 0.025115 |
| XLOC_037661 | -                                                                       | 0.002372 |
| XLOC_037667 | -                                                                       | 0.005845 |
| XLOC_037672 | -                                                                       | 0.002372 |
| XLOC_037763 | -                                                                       | 0.013835 |
| XLOC_037767 | -                                                                       | 0.012580 |
| XLOC_037795 | -                                                                       | 0.019332 |
| XLOC_037821 | -                                                                       | 0.019332 |
| XLOC_037827 | -                                                                       | 0.004177 |
| XLOC_037882 | -                                                                       | 0.002372 |
| XLOC_037889 | -                                                                       | 0.002372 |
| XLOC_038028 | -                                                                       | 0.031419 |
| XLOC_038085 | -                                                                       | 0.004177 |
| XLOC_038103 | NR4A1                                                                   | 0.002372 |
| XLOC_038122 | ENSSSCG00000004124                                                      | 0.031419 |
| XLOC_038225 | -                                                                       | 0.011350 |



|             |                    |          |
|-------------|--------------------|----------|
| XLOC_038265 | -                  | 0.002372 |
| XLOC_038283 | ALS2               | 0.031419 |
| XLOC_038322 | -                  | 0.002372 |
| XLOC_038362 | SEMA7A             | 0.002372 |
| XLOC_038364 | -                  | 0.002372 |
| XLOC_038369 | -                  | 0.038059 |
| XLOC_038373 | -                  | 0.002372 |
| XLOC_038546 | -                  | 0.030613 |
| XLOC_038549 | ENSSSCG00000021712 | 0.039463 |
| XLOC_038669 | ENSSSCG00000002453 | 0.036488 |
| XLOC_038672 | DAGLB              | 0.002372 |
| XLOC_038685 | ENSSSCG00000021949 | 0.002372 |
| XLOC_038714 | ENSSSCG00000028099 | 0.002372 |
| XLOC_038767 | ANG1,RSE4          | 0.002372 |
| XLOC_038772 | -                  | 0.017207 |
| XLOC_038773 | -                  | 0.047338 |
| XLOC_038782 | -                  | 0.002372 |
| XLOC_038783 | -                  | 0.034852 |
| XLOC_038815 | -                  | 0.005845 |
| XLOC_038823 | ENSSSCG00000026670 | 0.038749 |
| XLOC_038828 | ENSSSCG00000025390 | 0.002372 |
| XLOC_038892 | -                  | 0.024202 |
| XLOC_038902 | CPNE2              | 0.002372 |
| XLOC_038921 | -                  | 0.010072 |
| XLOC_038929 | MCTP2              | 0.048740 |
| XLOC_038931 | -                  | 0.044653 |
| XLOC_038983 | -                  | 0.002372 |
| XLOC_038984 | -                  | 0.002372 |
| XLOC_038985 | -                  | 0.002372 |
| XLOC_039011 | -                  | 0.002372 |
| XLOC_039051 | ASAP3              | 0.002372 |
| XLOC_039081 | -                  | 0.012580 |
| XLOC_039085 | -                  | 0.002372 |
| XLOC_039086 | -                  | 0.002372 |
| XLOC_039087 | -                  | 0.002372 |
| XLOC_039089 | -                  | 0.038059 |
| XLOC_039109 | GZMM               | 0.002372 |
| XLOC_039441 | -                  | 0.002372 |
| XLOC_039560 | -                  | 0.023280 |
| XLOC_039778 | ETV5               | 0.024202 |
| XLOC_039847 | -                  | 0.005845 |
| XLOC_039864 | -                  | 0.041076 |
| XLOC_039952 | -                  | 0.039463 |
| XLOC_039995 | -                  | 0.002372 |

|             |                    |          |
|-------------|--------------------|----------|
| XLOC_040288 | -                  | 0.004177 |
| XLOC_040301 | ENSSSCG00000024533 | 0.012580 |
| XLOC_040309 | ENSSSCG00000022360 | 0.002372 |
| XLOC_040310 | -                  | 0.004177 |
| XLOC_040315 | -                  | 0.002372 |
| XLOC_040317 | -                  | 0.036488 |
| XLOC_040352 | ENSSSCG00000022971 | 0.012580 |
| XLOC_040361 | -                  | 0.030613 |
| XLOC_040392 | -                  | 0.032252 |
| XLOC_040497 | RSE6               | 0.002372 |
| XLOC_040581 | CYFIP1             | 0.002372 |
| XLOC_040599 | -                  | 0.002372 |
| XLOC_040612 | -                  | 0.002372 |
| XLOC_040619 | IRF8               | 0.038059 |
| XLOC_040688 | ETS2               | 0.002372 |
| XLOC_040694 | -                  | 0.017207 |
| XLOC_040847 | ENSSSCG00000027764 | 0.047338 |
| XLOC_040920 | -                  | 0.018305 |
| XLOC_040928 | -                  | 0.005845 |
| XLOC_040956 | -                  | 0.023280 |
| XLOC_040957 | HMOX1              | 0.002372 |
| XLOC_040967 | -                  | 0.002372 |
| XLOC_040968 | UPP1               | 0.017207 |
| XLOC_040978 | SLC2A5             | 0.026101 |
| XLOC_040979 | -                  | 0.004177 |
| XLOC_041039 | S100A11            | 0.008746 |
| XLOC_041074 | -                  | 0.037305 |
| XLOC_041094 | ENSSSCG00000024640 | 0.045290 |
| XLOC_041120 | -                  | 0.008746 |
| XLOC_041169 | -                  | 0.002372 |
| XLOC_041183 | -                  | 0.031419 |
| XLOC_041194 | -                  | 0.013835 |
| XLOC_041241 | -                  | 0.029810 |
| XLOC_041250 | -                  | 0.025115 |
| XLOC_041341 | -                  | 0.037305 |
| XLOC_041345 | -                  | 0.017207 |
| XLOC_041346 | -                  | 0.018305 |
| XLOC_041347 | -                  | 0.002372 |
| XLOC_041348 | -                  | 0.030613 |
| XLOC_041350 | -                  | 0.010072 |
| XLOC_041413 | -                  | 0.007395 |
| XLOC_041480 | -                  | 0.004177 |
| XLOC_041501 | ENSSSCG00000026336 | 0.002372 |
| XLOC_041524 | -                  | 0.002372 |

|             |                    |          |
|-------------|--------------------|----------|
| XLOC_041525 | -                  | 0.002372 |
| XLOC_041526 | -                  | 0.002372 |
| XLOC_041528 | -                  | 0.002372 |
| XLOC_041529 | -                  | 0.002372 |
| XLOC_041530 | -                  | 0.033995 |
| XLOC_041532 | -                  | 0.018305 |
| XLOC_041533 | -                  | 0.012580 |
| XLOC_041534 | -                  | 0.007395 |
| XLOC_041535 | -                  | 0.024202 |
| XLOC_041536 | -                  | 0.044653 |
| XLOC_041613 | SLC37A3            | 0.028943 |
| XLOC_041626 | -                  | 0.034852 |
| XLOC_041657 | IFR2               | 0.011350 |
| XLOC_041668 | HIATL1             | 0.002372 |
| XLOC_041675 | DCTN6              | 0.048740 |
| XLOC_041718 | AKR1A1             | 0.042609 |
| XLOC_041737 | -                  | 0.002372 |
| XLOC_041774 | -                  | 0.013835 |
| XLOC_041775 | -                  | 0.007395 |
| XLOC_041776 | -                  | 0.010072 |
| XLOC_041789 | TRIB1              | 0.047338 |
| XLOC_041875 | -                  | 0.019332 |
| XLOC_041911 | ENSSSCG00000027269 | 0.002372 |
| XLOC_041939 | -                  | 0.004177 |
| XLOC_041950 | -                  | 0.008746 |
| XLOC_041962 | ENSSSCG00000021402 | 0.002372 |
| XLOC_042002 | CSF3R              | 0.002372 |
| XLOC_042011 | WDR73              | 0.004177 |
| XLOC_042021 | ISG15              | 0.008746 |
| XLOC_042052 | ENSSSCG00000021766 | 0.015000 |
| XLOC_042089 | -                  | 0.002372 |
| XLOC_042120 | -                  | 0.033125 |
| XLOC_042124 | -                  | 0.018305 |
| XLOC_042126 | SEPX1              | 0.012580 |
| XLOC_042224 | ENSSSCG00000026820 | 0.002372 |
| XLOC_042246 | -                  | 0.049392 |
| XLOC_042247 | RNH1               | 0.038749 |
| XLOC_042274 | -                  | 0.002372 |
| XLOC_042288 | ENSSSCG00000028609 | 0.048740 |
| XLOC_042308 | CECR1              | 0.002372 |
| XLOC_042316 | EMR4               | 0.002372 |
| XLOC_042323 | S100B              | 0.002372 |
| XLOC_042384 | ENSSSCG00000028437 | 0.013835 |
| XLOC_042494 | PDXK               | 0.002372 |

|             |                                           |          |
|-------------|-------------------------------------------|----------|
| XLOC_042590 | CSF2RA                                    | 0.002372 |
| XLOC_042599 | PYGB                                      | 0.045889 |
| XLOC_042600 | ABHD12                                    | 0.002372 |
| XLOC_042621 | -                                         | 0.041076 |
| XLOC_042638 | ARHGEF40                                  | 0.025115 |
| XLOC_042713 | C3AR1                                     | 0.002372 |
| XLOC_042724 | TNFRSF1B                                  | 0.007395 |
| XLOC_042756 | SNORD107                                  | 0.046618 |
| XLOC_042757 | SNRPN                                     | 0.004177 |
| XLOC_042819 | PRSS57                                    | 0.002372 |
| XLOC_042822 | -                                         | 0.002372 |
| XLOC_042846 | ENSSSCG00000021006                        | 0.008746 |
| XLOC_042848 | -                                         | 0.010072 |
| XLOC_042936 | -                                         | 0.002372 |
| XLOC_042937 | CDKN1B                                    | 0.002372 |
| XLOC_042939 | -                                         | 0.012580 |
| XLOC_042951 | -                                         | 0.026101 |
| XLOC_042952 | -                                         | 0.035659 |
| XLOC_042967 | DPP7                                      | 0.002372 |
| XLOC_043046 | -                                         | 0.002372 |
| XLOC_043048 | -                                         | 0.002372 |
| XLOC_043098 | -                                         | 0.024202 |
| XLOC_043099 | -                                         | 0.041076 |
| XLOC_043128 | PTGER4                                    | 0.005845 |
| XLOC_043147 | S100A6                                    | 0.002372 |
| XLOC_043150 | KCNJ2                                     | 0.002372 |
| XLOC_043155 | -                                         | 0.002372 |
| XLOC_043167 | -                                         | 0.047338 |
| XLOC_043168 | -                                         | 0.002372 |
| XLOC_043169 | -                                         | 0.016103 |
| XLOC_043210 | ENSSSCG00000001071                        | 0.004177 |
| XLOC_043228 | ENSSSCG00000016503                        | 0.025115 |
| XLOC_043264 | -                                         | 0.023280 |
| XLOC_043301 | MAP3K11                                   | 0.012580 |
| XLOC_043303 | -                                         | 0.002372 |
| XLOC_043402 | NRP2                                      | 0.002372 |
| XLOC_043422 | -                                         | 0.002372 |
| XLOC_043426 | ENSSSCG00000025114                        | 0.033995 |
| XLOC_043483 | ENSSSCG00000011117,ENSSSC<br>G00000029195 | 0.019332 |
| XLOC_043484 | COMMD6                                    | 0.041848 |
| XLOC_043491 | ABHD10                                    | 0.002372 |
| XLOC_043495 | DSC2                                      | 0.002372 |
| XLOC_043657 | ENSSSCG00000022138                        | 0.036488 |

|             |                            |          |
|-------------|----------------------------|----------|
| XLOC_043659 | ENSSSCG00000023735         | 0.002372 |
| XLOC_043663 | ENSSSCG00000030268         | 0.039463 |
| XLOC_043667 | GPRC5C                     | 0.015000 |
| XLOC_043668 | -                          | 0.023280 |
| XLOC_043669 | -                          | 0.002372 |
| XLOC_043717 | TLR4                       | 0.023280 |
| XLOC_043955 | -                          | 0.024202 |
| XLOC_043964 | ENSSSCG00000028219         | 0.044005 |
| XLOC_043981 | ENSSSCG00000022587         | 0.027058 |
| XLOC_043987 | -                          | 0.004177 |
| XLOC_043989 | -                          | 0.002372 |
| XLOC_043992 | -                          | 0.043224 |
| XLOC_043995 | -                          | 0.002372 |
| XLOC_043997 | -                          | 0.002372 |
| XLOC_043998 | -                          | 0.012580 |
| XLOC_044001 | -                          | 0.020320 |
| XLOC_044002 | -                          | 0.029810 |
| XLOC_044004 | -                          | 0.004177 |
| XLOC_044005 | -                          | 0.043224 |
| XLOC_044044 | -                          | 0.031419 |
| XLOC_044284 | TBL1Y                      | 0.042609 |
| XLOC_044290 | WWC3                       | 0.007395 |
| XLOC_044313 | BMX                        | 0.008746 |
| XLOC_044340 | PRDX4                      | 0.045290 |
| XLOC_044370 | GK                         | 0.002372 |
| XLOC_044394 | CYBB,XK                    | 0.005845 |
| XLOC_044401 | ENSSSCG00000012238         | 0.010072 |
| XLOC_044404 | CH242-236H6.1              | 0.004177 |
| XLOC_044406 | ATP6AP2                    | 0.002372 |
| XLOC_044426 | RP2                        | 0.002372 |
| XLOC_044433 | CFP,CH242-69I19.6,ELK1,UXT | 0.002372 |
| XLOC_044438 | ENSSSCG00000021591         | 0.002372 |
| XLOC_044461 | CLCN5                      | 0.002372 |
| XLOC_044501 | ENSSSCG00000012359         | 0.048079 |
| XLOC_044506 | -                          | 0.002372 |
| XLOC_044508 | VSIG4                      | 0.002372 |
| XLOC_044517 | PJA1                       | 0.026101 |
| XLOC_044572 | ENSSSCG00000012439         | 0.002372 |
| XLOC_044577 | P2Y10                      | 0.004177 |
| XLOC_044582 | -                          | 0.002372 |
| XLOC_044627 | P1L3                       | 0.038749 |
| XLOC_044641 | BHLHB9,GPRASP2             | 0.002372 |
| XLOC_044661 | TBC1D8B                    | 0.002372 |
| XLOC_044718 | -                          | 0.031419 |

|             |                           |          |
|-------------|---------------------------|----------|
| XLOC_044735 | SH2D1A                    | 0.002372 |
| XLOC_044742 | OCRL                      | 0.012580 |
| XLOC_044759 | -                         | 0.011350 |
| XLOC_044861 | -                         | 0.007395 |
| XLOC_044862 | MPP1                      | 0.002372 |
| XLOC_044867 | G6PD                      | 0.008746 |
| XLOC_044998 | CASK                      | 0.038059 |
| XLOC_045004 | MAOA                      | 0.005845 |
| XLOC_045005 | MAOB                      | 0.002372 |
| XLOC_045013 | ssc-mir-221,ssc-mir-222   | 0.002372 |
| XLOC_045025 | TIMP1                     | 0.002372 |
| XLOC_045097 | ARHGEF9                   | 0.030613 |
| XLOC_045103 | ENSSSCG00000028241        | 0.002372 |
| XLOC_045152 | PGK1                      | 0.005845 |
| XLOC_045155 | GPR174                    | 0.002372 |
| XLOC_045254 | ACSL4,CH242-17O13.4,KCNE5 | 0.044653 |
| XLOC_045284 | SLC25A43                  | 0.015000 |
| XLOC_045287 | LONRF3                    | 0.002372 |
| XLOC_045290 | IL13RA1                   | 0.008746 |
| XLOC_045292 | KLHL13                    | 0.021314 |
| XLOC_045396 | RENBP                     | 0.002372 |
| XLOC_045420 | -                         | 0.005845 |
| XLOC_045436 | -                         | 0.002372 |
| XLOC_045474 | -                         | 0.002372 |
| XLOC_045476 | -                         | 0.002372 |
| XLOC_045483 | -                         | 0.026101 |
| XLOC_045485 | -                         | 0.002372 |
| XLOC_045496 | -                         | 0.002372 |
| XLOC_045522 | -                         | 0.002372 |
| XLOC_045563 | -                         | 0.038749 |
| XLOC_045570 | -                         | 0.002372 |
| XLOC_045575 | -                         | 0.002372 |
| XLOC_045710 | -                         | 0.002372 |

---

Supplementary Table 3. Product sizes and the primers used for qRT-PCR

| Gene   | GenBank accession Number | Forward Primer(5'-3') | Reverse Primer(5'-3') | Amplicon Size (bp) |
|--------|--------------------------|-----------------------|-----------------------|--------------------|
| B2M    | ENSSSCG00000004682       | GCGGAAAACGGAAAGCCAAA  | CACGCGGCAGCTATACTGAT  | 201                |
| PTI    | ENSSSCG00000025317       | TGGCTTTAGTAGCCCTGGATG | GCATTTTGCTCGGTGGTGTT  | 189                |
| C3AR1  | ENSSSCG00000023868       | TGCCCTCCTGGGGAAAGATA  | ACTGGGTGGAGCCCTAAGAA  | 200                |
| CCL5   | ENSSSCG00000017705       | GAAATGGGTGCGGGAGTACA  | AGGAGCCCTGGGAGGTTTTA  | 215                |
| CCL8   | ENSSSCG00000017721       | GATCACCTGCTGCTTCGGT   | TCAAGGCTTTGGGGTTTGGG  | 208                |
| CCR1   | ENSSSCG00000011322       | CCCAGTGGGAGTTCAGTCAC  | ATCAGACGCACAGCTTTGGA  | 202                |
| CCRL2  | ENSSSCG00000023557       | CCTCAACCTGGCAGTGTGTA  | TGGCCGAGAAAAACCCTCTC  | 212                |
| GZMA   | ENSSSCG00000016903       | ATGTGTGTCGAGTTGCAGGAT | TGCAGGAGTCTTTTCCACCTT | 189                |
| GZMH   | ENSSSCG00000022894       | ACTGCAGGGGAAGCTCAATC  | ACAGCCTTAGTCAGCTTGGC  | 181                |
| P2RY13 | ENSSSCG00000011716       | CTGGGGCTGAAATGGCATCA  | AGAAGACAGCCACGACAACAA | 193                |
| TFPI   | ENSSSCG00000016032       | GAACCCCTCTTGAGGCTTTGA | ACTGTACTTAAAGGGGCGGC  | 185                |
| TLR4   | ENSSSCG00000005503       | AGCTGTATCGCCTTCTCAGC  | ACGTTGGGAGTTTTCCCTCC  | 193                |
| TLR6   | ENSSSCG00000026592       | CTGCCTGGATGTGGTTCCTT  | CAGGCCAACTCTCTACCACG  | 208                |

Supplement Table 4.Gene fold change tested by qRT-PCR and RNA-Seq

| Gene   | qRT-PCR     |             |             |             |            |            |            |            | RNA-Seq     |            |             |             |            |            |            |            |
|--------|-------------|-------------|-------------|-------------|------------|------------|------------|------------|-------------|------------|-------------|-------------|------------|------------|------------|------------|
|        | Failure-1 / | Failure-2 / | Failure-3 / | Failure-4 / | Dying-1/   | Dying-2 /  | Dying-3 /  | Dying-4 /  | Failure-1 / | Failure-2/ | Failure-3 / | Failure-4 / | Dying-1 /  | Dying-2 /  | Dying-3 /  | Dying-4 /  |
|        | Baseline-1  | Baseline-2  | Baseline-3  | Baseline-4  | Baseline-1 | Baseline-2 | Baseline-3 | Baseline-4 | Baseline-1  | Baseline-2 | Baseline-3  | Baseline-4  | Baseline-1 | Baseline-2 | Baseline-3 | Baseline-4 |
| PTI    | 1.0         | 2.2         | 1.9         | 2.5         | 0.5        | 1.7        | 1.3        | 0.5        | 1.3         | 3.6        | 1.9         | 2.0         | 0.8        | 2.5        | 1.5        | 0.5        |
| C3AR1  | 11.4        | 11.1        | 4.9         | 15.0        | 8.7        | 13.7       | 12.3       | 19.8       | 3.4         | 7.5        | 5.1         | 11.7        | 4.3        | 10.7       | 6.5        | 13.5       |
| CCL5   | 0.2         | 0.3         | 0.2         | 0.5         | 0.4        | 0.2        | 0.2        | 0.6        | 0.5         | 0.2        | 0.3         | 0.4         | 0.8        | 0.2        | 0.4        | 0.4        |
| CCL8   | 29.7        | 3.8         | 9.6         | 2.1         | 30.5       | 6.5        | 63.5       | 29.8       | 19.6        | 5.5        | 10.1        | 1.3         | 20.0       | 7.6        | 48.6       | 16.8       |
| CCR1   | 3.5         | 2.2         | 2.1         | 6.3         | 2.0        | 2.1        | 2.7        | 3.6        | 1.5         | 3.7        | 2.6         | 5.4         | 1.0        | 3.4        | 1.8        | 4.3        |
| CCRL2  | 2.9         | 1.0         | 1.9         | 2.5         | 2.5        | 1.6        | 3.1        | 4.9        | 2.1         | 1.6        | 1.9         | 2.0         | 1.8        | 1.9        | 3.1        | 4.2        |
| GZMA   | 5.8         | 0.2         | 0.3         | 0.7         | 8.5        | 0.1        | 0.2        | 0.6        | 0.6         | 0.2        | 0.3         | 0.8         | 0.8        | 0.1        | 0.3        | 0.6        |
| GZMH   | 0.6         | 0.2         | 0.3         | 0.4         | 0.6        | 0.1        | 0.3        | 0.5        | 0.6         | 0.2        | 0.3         | 0.2         | 0.5        | 0.1        | 0.4        | 0.3        |
| P2RY13 | 3.4         | 3.1         | 2.9         | 1.3         | 1.3        | 2.2        | 2.4        | 3.6        | 9.6         | 5.4        | 3.5         | 2.1         | 6.1        | 5.2        | 4.2        | 7.2        |
| TFPI   | 1.9         | 2.9         | 1.5         | 2.6         | 0.7        | 1.4        | 1.1        | 0.3        | 1.3         | 5.0        | 2.1         | 3.7         | 0.7        | 2.3        | 1.3        | 0.4        |
| TLR4   | 2.3         | 2.9         | 1.4         | 4.2         | 1.3        | 6.9        | 2.7        | 6.2        | 1.1         | 1.8        | 1.4         | 4.1         | 1.6        | 4.0        | 2.2        | 5.4        |
| TLR6   | 4.5         | 1.2         | 3.4         | 1.7         | 1.8        | 1.4        | 10.3       | 7.9        | 1.1         | 1.4        | 2.0         | 1.6         | 1.5        | 1.9        | 2.1        | 2.1        |
